# Supplementary material for: Neuronal C/EBPβ/AEP pathway shortens life span via selective GABAnergic neuronal degeneration by FOXO repression
Source: PubMed Central journal article supplement — Sci Adv. 2022 Mar 30;8(13):eabj8658. doi: 10.1126/sciadv.abj8658 (PMC8967231; doi:10.1126/sciadv.abj8658), 2022-03-30
Supplement: sciadv.abj8658_sm.pdf [file sciadv.abj8658_sm.pdf]

Supplementary Materials for  
**Neuronal C/EBP $\beta$ /AEP pathway shortens life span via selective GABAergic neuronal degeneration by FOXO repression**

Yiyuan Xia, Hiroshi Qadota, Zhi-Hao Wang, Pai Liu, Xia Liu, Karen X. Ye,  
Courtney J. Matheny, Ken Berglund, Shan Ping Yu, Derek Drake, David A. Bennett,  
Xiao-Chuan Wang, Bruce A. Yankner, Guy M. Benian, Keqiang Ye\*

\*Corresponding author. Email: [kq.ye@siat.ac.cn](mailto:kq.ye@siat.ac.cn)

Published 30 March 2022, *Sci. Adv.* **8**, eabj8658 (2022)  
DOI: [10.1126/sciadv.abj8658](https://doi.org/10.1126/sciadv.abj8658)

**The PDF file includes:**

Figs. S1 to S14  
Tables S1 and S2  
Legend for supporting file 1

**Other Supplementary Material for this manuscript includes the following:**

Supporting file S1

**Figure S1**

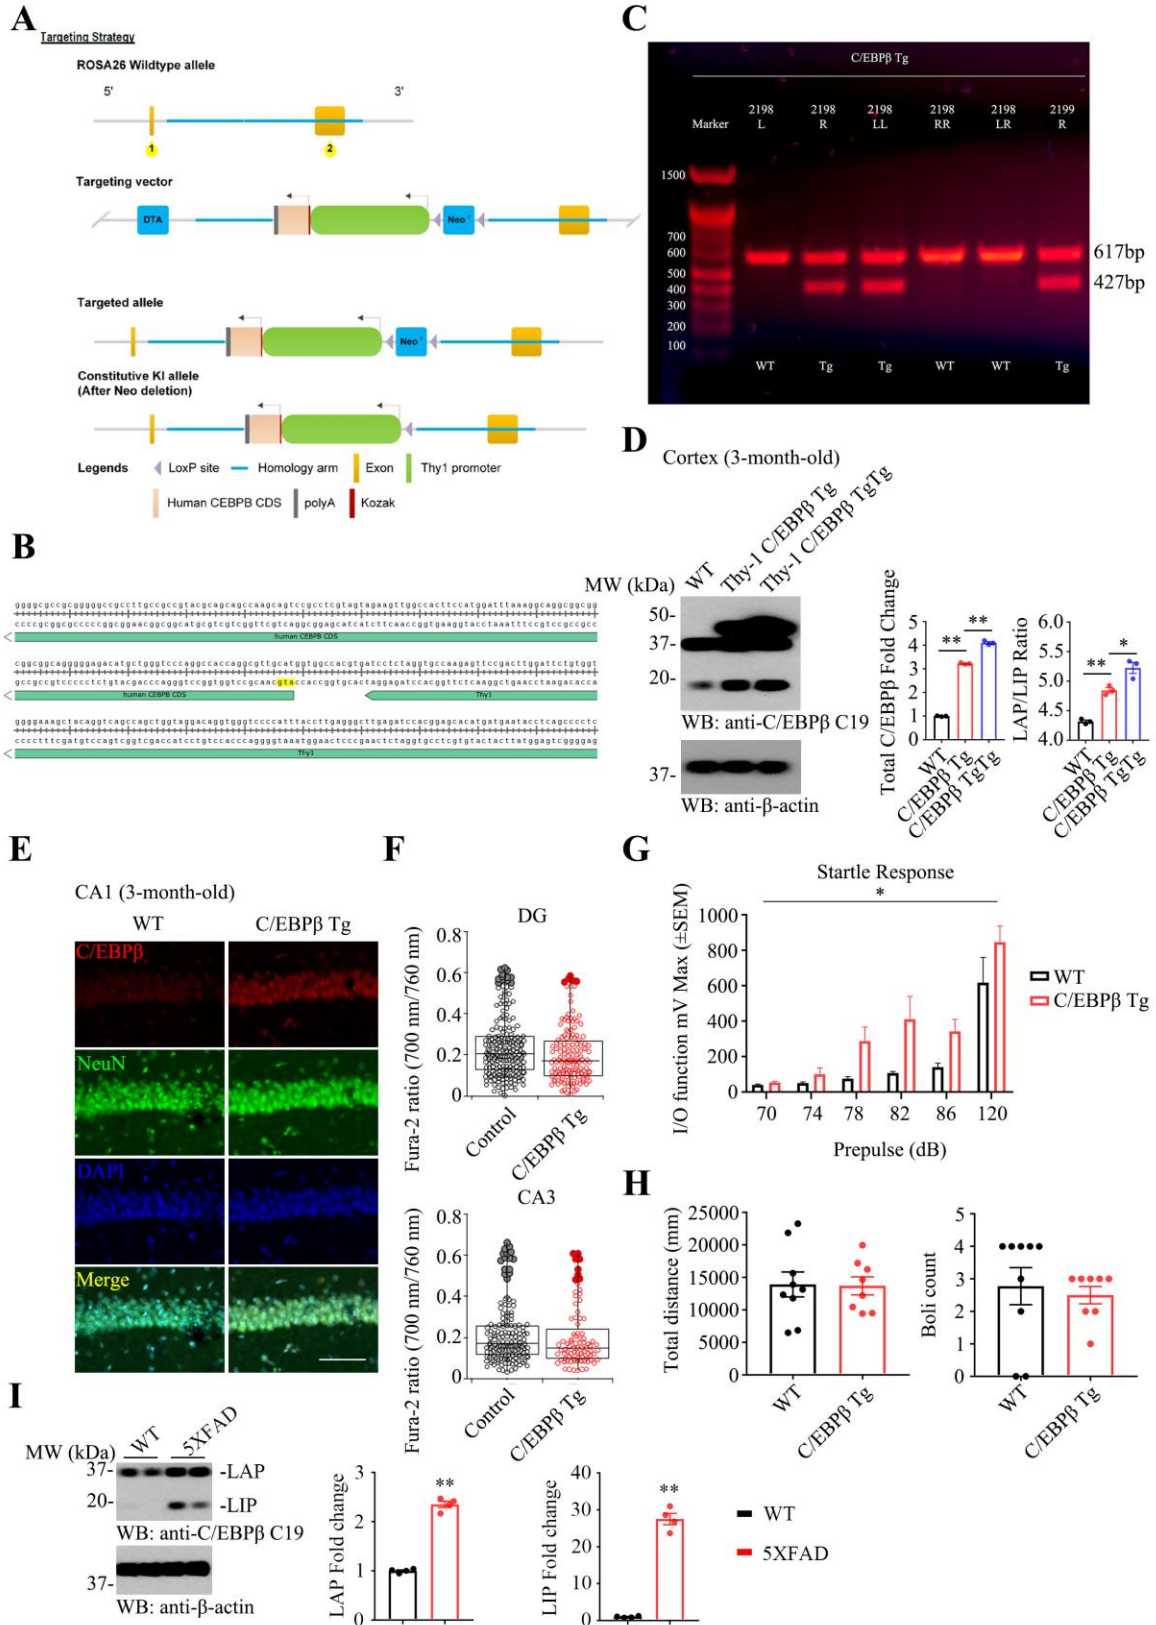

**Fig S1. Characterization of Thy1-C/EBP $\beta$  transgenic mice.**

**A.** Schematic diagram of the targeting strategy and allele. **B.** Key sequence of the transgenic gene, Thy1 promoter and human C/EBP $\beta$  CDS are connected with a Kozak motif. **C.** Genotyping of the C/EBP $\beta$  Tg mice, WT=617 bp band, Tg=427 bp band. **D.** WB verification of human C/EBP $\beta$  expression in Thy1 C/EBP $\beta$  Tg mice brains. Human C/EBP $\beta$  MW ~ 45 kDa, mouse C/EBP $\beta$  ~ 37 kDa. Total C/EBP $\beta$  change and the LAP/LIP ratios were calculated from quantification by immunoblots, Data are represented as mean  $\pm$  s.e.m., n=3 per group. \* $p$ <0.05, \*\* $p$ <0.01; two-way ANOVA and Bonferroni's post hoc test. **E.** Colocalization of C/EBP $\beta$  and NeuN in the CA1 region of 3-month-old mice. C/EBP $\beta$  (Red), NeuN (Green), DAPI (Blue), Scale bar, 100  $\mu$ m. **F.** No significant difference in  $[Ca^{2+}]_i$  in DG or CA3 determined by two-photon  $Ca^{2+}$  imaging in acute brain slice loaded with Fura-2. The box plots indicate first, median, and third quartiles as well as outliers.  $N=194$  and 148 (WT control), 138 and 84 cells (C/EBP $\beta$  Tg) pooled from 6 animals each,  $p>0.05$  and 0.5,  $t(330)=1.91$  and  $t(230)=0.67$  for DG and CA3, respectively, two-tailed Student's  $t$ -test. **G.** I/O function of Prepulse Inhibition (PPI) showed that C/EBP $\beta$  Tg mice were increased in hearing sensitivity vs. WT mice (mean  $\pm$  s.e.m.; n = 8 mice per group; unpaired  $t$  test with Welch's correction). **H.** Open field test, no difference between WT and C/EBP $\beta$  Tg mice in total distance and boli count (mean  $\pm$  s.e.m.; n = 8 mice per group; unpaired  $t$  test with Welch's correction). **I.** 12-months-old 5XFAD and its WT littermate brain tissue were used to detect C/EBP $\beta$  by WB. both C/EBP $\beta$  LAP and LIP were upregulated by A $\beta$  in AD mouse model. Data are represented as mean  $\pm$  s.e.m., n=4 per group. \*\* $p$ <0.01; two-tailed Student's  $t$ -test.

**Figure S2**

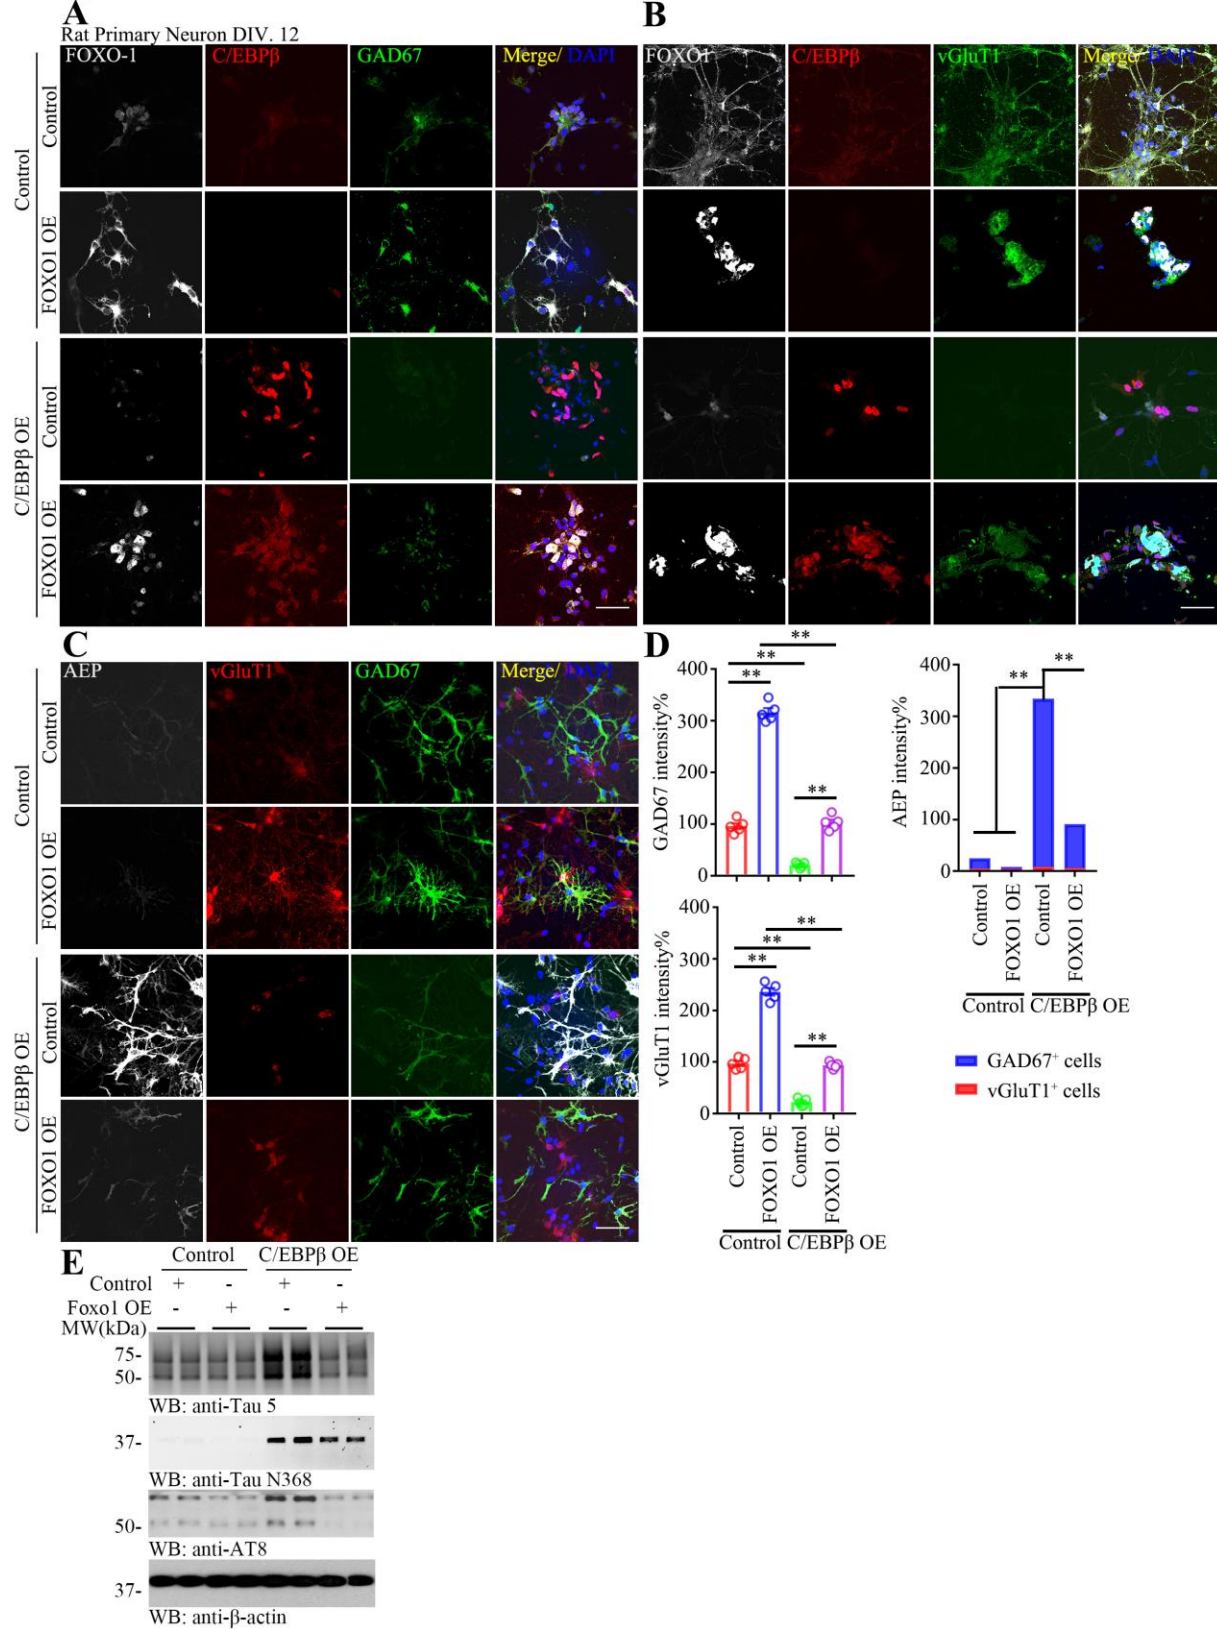

**Fig S2. C/EBP $\beta$  overexpression selectively augments AEP levels in GABAergic neurons**

**A-B.** C/EBP $\beta$  overexpression decreases Glutamatergic or GABAergic neurons, which is reversed by FOXO1 overexpression. Rat primary neurons (DIV. 12) were infected with FOXO1 or C/EBP $\beta$  lentivirus for 72 h. Neurons were fixed and permeabilized, cells were incubated with FOXO1, C/EBP $\beta$ , vGlut1 and GAD67 antibodies. vGlut1 marked the Glutamatergic neurons, GAD67 marked GABAergic neurons. The nuclei were stained with DAPI. Control=Vector virus (Scale bar: 50  $\mu$ m). **C.** C/EBP $\beta$  selectively augments AEP in GABAergic versus Glutamatergic neurons. Rat primary neurons (DIV. 12) were infected with FOXO1 or C/EBP $\beta$  lentivirus for 72 h. Neurons were fixed and permeabilized, cells were incubated with AEP, vGlut1 and GAD67 antibodies. vGlut1 marked the Glutamatergic neuron, GAD67 marked GABAergic neuron. The nuclei were stained with DAPI. Control=Vector virus (Scale bar: 50  $\mu$ m.). **D.** Quantification of GAD67 and vGlut1 fluorescent intensities induced by C/EBP $\beta$  and FOXO1 overexpression (Left, mean  $\pm$  s.e.m.; n = 6; \*\*, p < 0.01; two-way ANOVA and Sidak's multiple comparison test). Quantification of AEP fluorescent intensities in neurons induced by C/EBP $\beta$  and FOXO1 overexpression, percentage of Glutamatergic or GABAergic neurons also showed. (Right, mean  $\pm$  s.e.m.; n = 6; \*\*, p < 0.01; unpaired t test with Welch's correction). **E.** Immunoblotting from C/EBP $\beta$  overexpressed neurons. WB showed the cleavage of Tau N368 in neurons by active AEP and tau phosphorylation induced by C/EBP $\beta$  or FOXO1 overexpression.



**Figure S3**

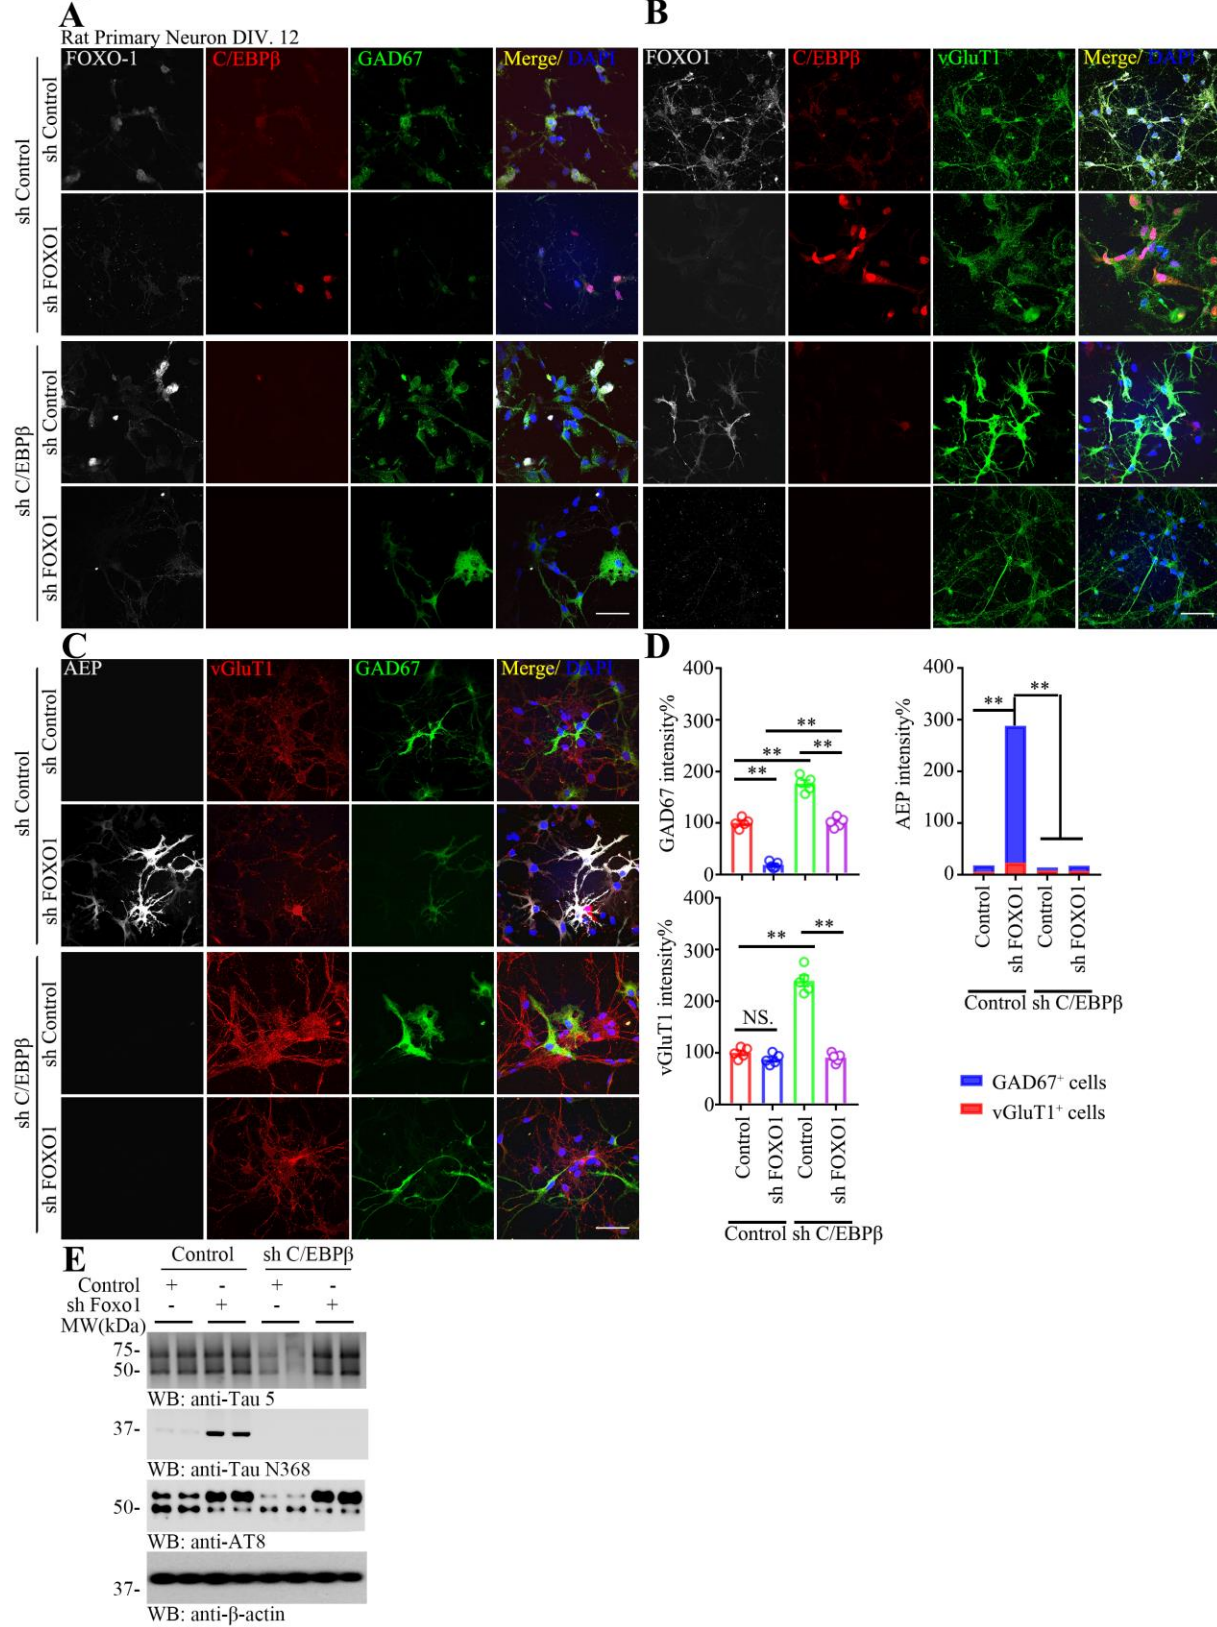

**Fig S3. FOXO1 deletion increases C/EBP $\beta$  and AEP levels in GABAergic neurons.**

**A-B.** Immunofluorescent co-staining. Knocking down FOXO1 and C/EBP $\beta$  regulated GAD67 and vGlut1 expression in Glutamatergic or GABAergic neurons. Rat primary neurons (DIV. 12) were infected with sh-FOXO1 or sh-C/EBP $\beta$  lentivirus for 72 h. Neurons were fixed and permeabilized, and cells were incubated with FOXO1, C/EBP $\beta$ , vGlut1 and GAD67 antibodies. vGlut1 marked the Glutamatergic neurons, GAD67 marked GABAergic neurons. The nuclei were stained with DAPI. Control=Vector virus (Scale bar: 50  $\mu$ m). **C.** Knocking down FOXO1 selectively increases AEP expression in GABAergic versus Glutamatergic neurons, which is abolished by depletion of C/EBP $\beta$ . Rat primary neurons (DIV. 12) were infected with sh-FOXO1 or sh-C/EBP $\beta$  lentivirus for 72 h. Neurons were fixed and permeabilized, cells were incubated with AEP, vGlut1 and GAD67 antibodies. vGlut1 marked the Glutamatergic neurons, GAD67 marked GABAergic neurons. The nuclei were stained with DAPI. Control=Vector virus (Scale bar: 50  $\mu$ m). **D.** Quantification of GAD67 or vGlut1 fluorescent intensities induced by C/EBP $\beta$  knock down (Left, mean  $\pm$  s.e.m.; n = 6; \*\*, p < 0.01; two-way ANOVA and Sidak's multiple comparison test). Quantification of AEP fluorescent intensities in neurons infected with sh-FOXO1 or sh-C/EBP $\beta$ , percentage of Glutamatergic or GABAergic neurons also showed. (Right, mean  $\pm$  s.e.m.; n = 6; \*\*, p < 0.01; unpaired t test with Welch's correction). **E.** WB showed the cleavage of Tau N368 by active AEP and tau phosphorylation induced by C/EBP $\beta$  or FOXO1 knock down.

**Figure S4**

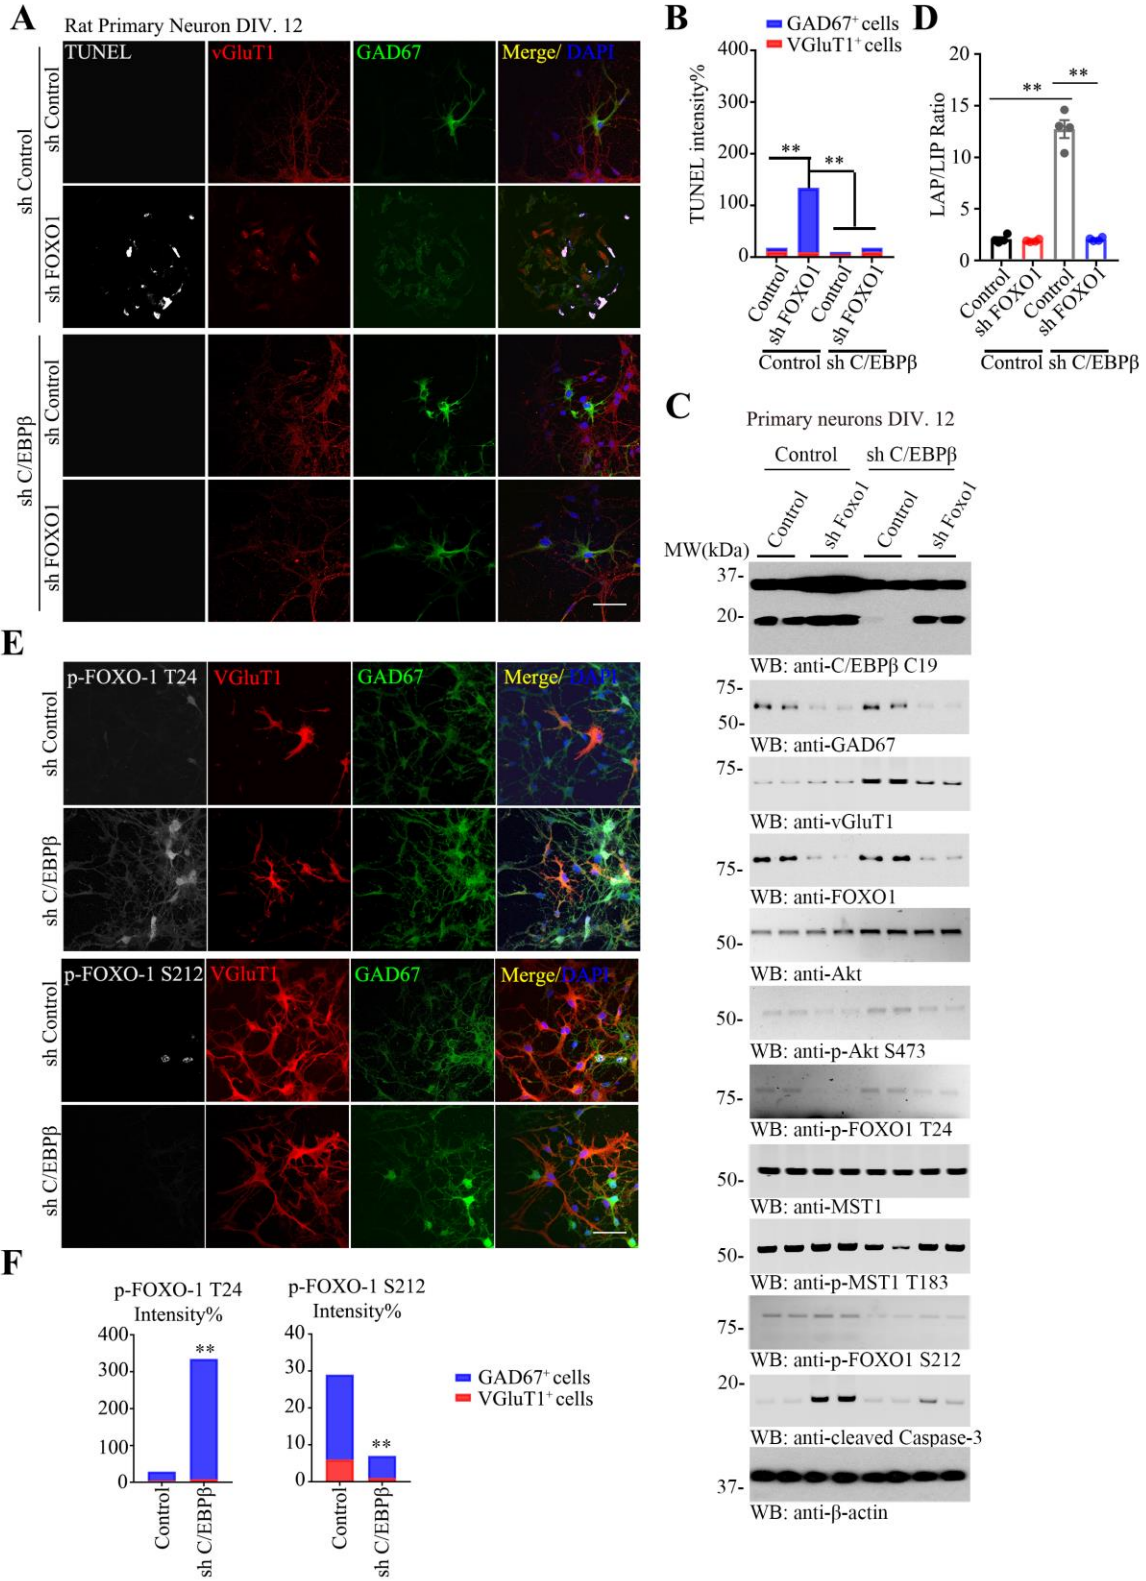



**Fig S4. Knocking down neuronal C/EBP $\beta$  protects GABAergic neuronal degeneration induced by FOXO1 depletion.**

**A.** C/EBP $\beta$  knockdown inhibits GABAergic neuronal apoptosis. Rat primary neurons (DIV. 12) were infected with sh-FOXO1 or sh-C/EBP $\beta$  lentivirus for 72 h. Neurons were fixed and permeabilized. After TUNEL staining, cells were incubated with vGlut1 and GAD67 antibodies. After incubated with 2 secondary antibodies conjugated with Alexa Fluor<sup>TM</sup>-488 or Cy5 for 1 h respectively, neurons were analyzed under a confocal microscope. vGlut1 marked the Glutamatergic neurons, GAD67 marked GABAergic neurons. The nuclei were stained with DAPI. Arrows indicate the merged part, respectively. Control=Vector virus (Scale bar: 50  $\mu$ m).

**B.** Quantification of TUNEL-positive neurons induced by FOXO1 or C/EBP $\beta$  knockdown, percentage of Glutamatergic or GABAergic neurons also showed. (mean  $\pm$  s.e.m.; n = 6; \*\* p < 0.01; unpaired t test with Welch's correction).

**C.** Immunoblotting analysis from neurons infected with virus expressing of sh-C/EBP $\beta$ . C/EBP $\beta$  knockdown promoted Akt activation and FOXO1 T24 phosphorylation and inhibited MST1 activation and FOXO1 S212 phosphorylation. Western blot was conducted with various indicated antibodies.

**D.** The LAP/LIP isoform ratios were calculated from quantification by immunoblots of C, Data are represented as mean  $\pm$  s.e.m., n=4 per group. \*\*p<0.01; two-way ANOVA and Bonferroni's post hoc test.

**E.** Depletion of C/EBP $\beta$  mediates p-FOXO1 status. C/EBP $\beta$  knockdown promoted FOXO1 T24 phosphorylation in GABAergic other than Glutamatergic neurons. Rat primary neurons (DIV. 12) were infected with sh-vector or sh-C/EBP $\beta$  lentivirus for 72 h. Neurons were fixed and permeabilized, and cells were incubated with p-FOXO1, vGlut1 and GAD67 antibodies. After incubated with 3 secondary antibodies conjugated with Alexa Fluor<sup>TM</sup>-488, -594 or -Cy5 for 1 h, respectively, neurons were analyzed under a confocal microscope. vGlut1 marked the Glutamatergic neurons, GAD67 marked GABAergic neurons. The nuclei were stained with DAPI. Arrows indicate the merged part, respectively. Control=Vector virus (Scale bar: 50  $\mu$ m).

**F.** Quantification of p-FOXO1 T24 or p-FOXO1-S212-positive neurons induced by C/EBP $\beta$  knockdown, percentage of Glutamatergic or GABAergic neurons also showed. (mean  $\pm$  s.e.m.; n = 6; \*\*, p < 0.01; unpaired t test with Welch's correction).

## Figure S5

**A**

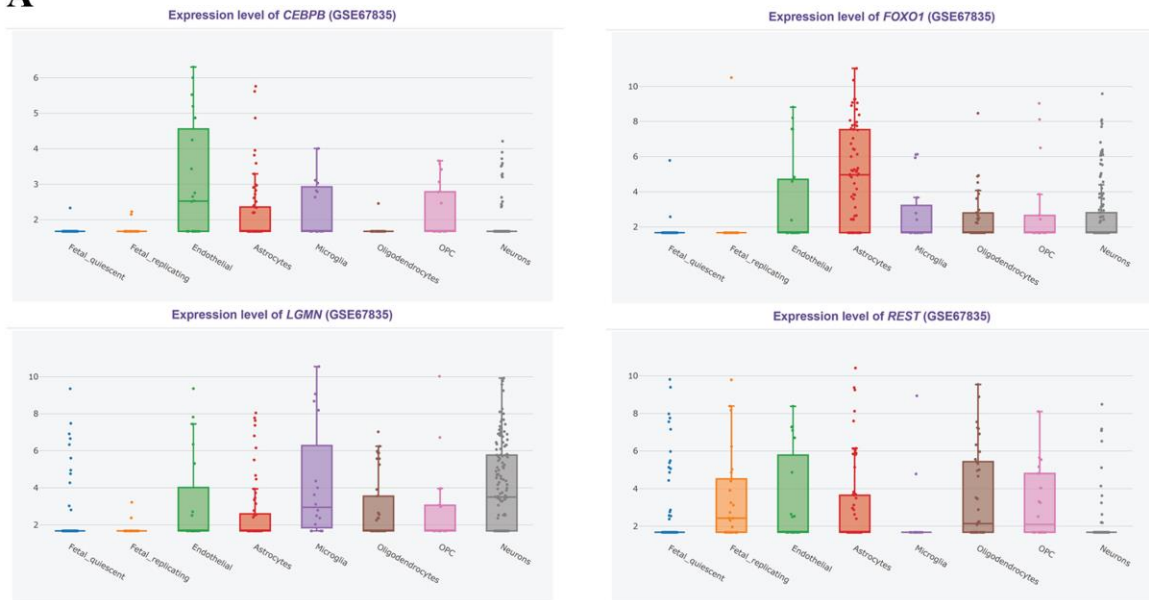

**B**

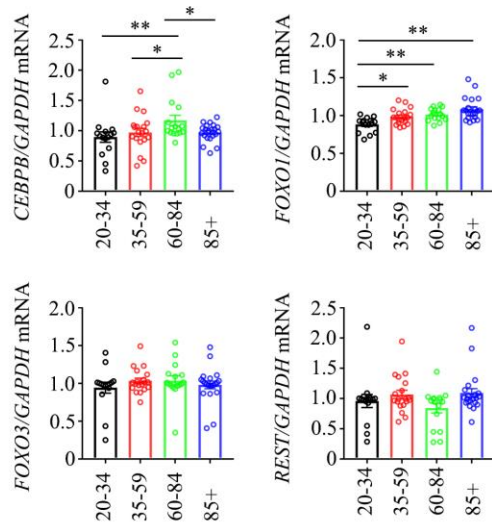

**Fig S5. Analysis of *CEBPB*, *FOXO1*, *LGMN*, and *REST* genes expression in the brain**

**A.** Single cell RNA-seq of different cell types from the human brain. (Data set ID: GSE67835, online program [http://www.alzdata.org/single\\_RNAseq1.php](http://www.alzdata.org/single_RNAseq1.php)). Shown the expression levels of *CEBPB*, *FOXO1*, *LGMN*, and *REST* in different brain cell types. **B.** Expression of *CEBPB*, *FOXO1*, *FOXO3*, and *REST* in different ages of individuals (20-34 years old, n=15; 35-59 years old, n=19; 60-84 years old, n=16; 85+ years old, n=21) in the cohorts (Data set ID: GDS5204 & GDS707). Data are represented as mean  $\pm$  s.e.m.. \*p<0.05, \*\*p <0.01, two-way ANOVA and Bonferroni's post hoc test.

**Figure S6**

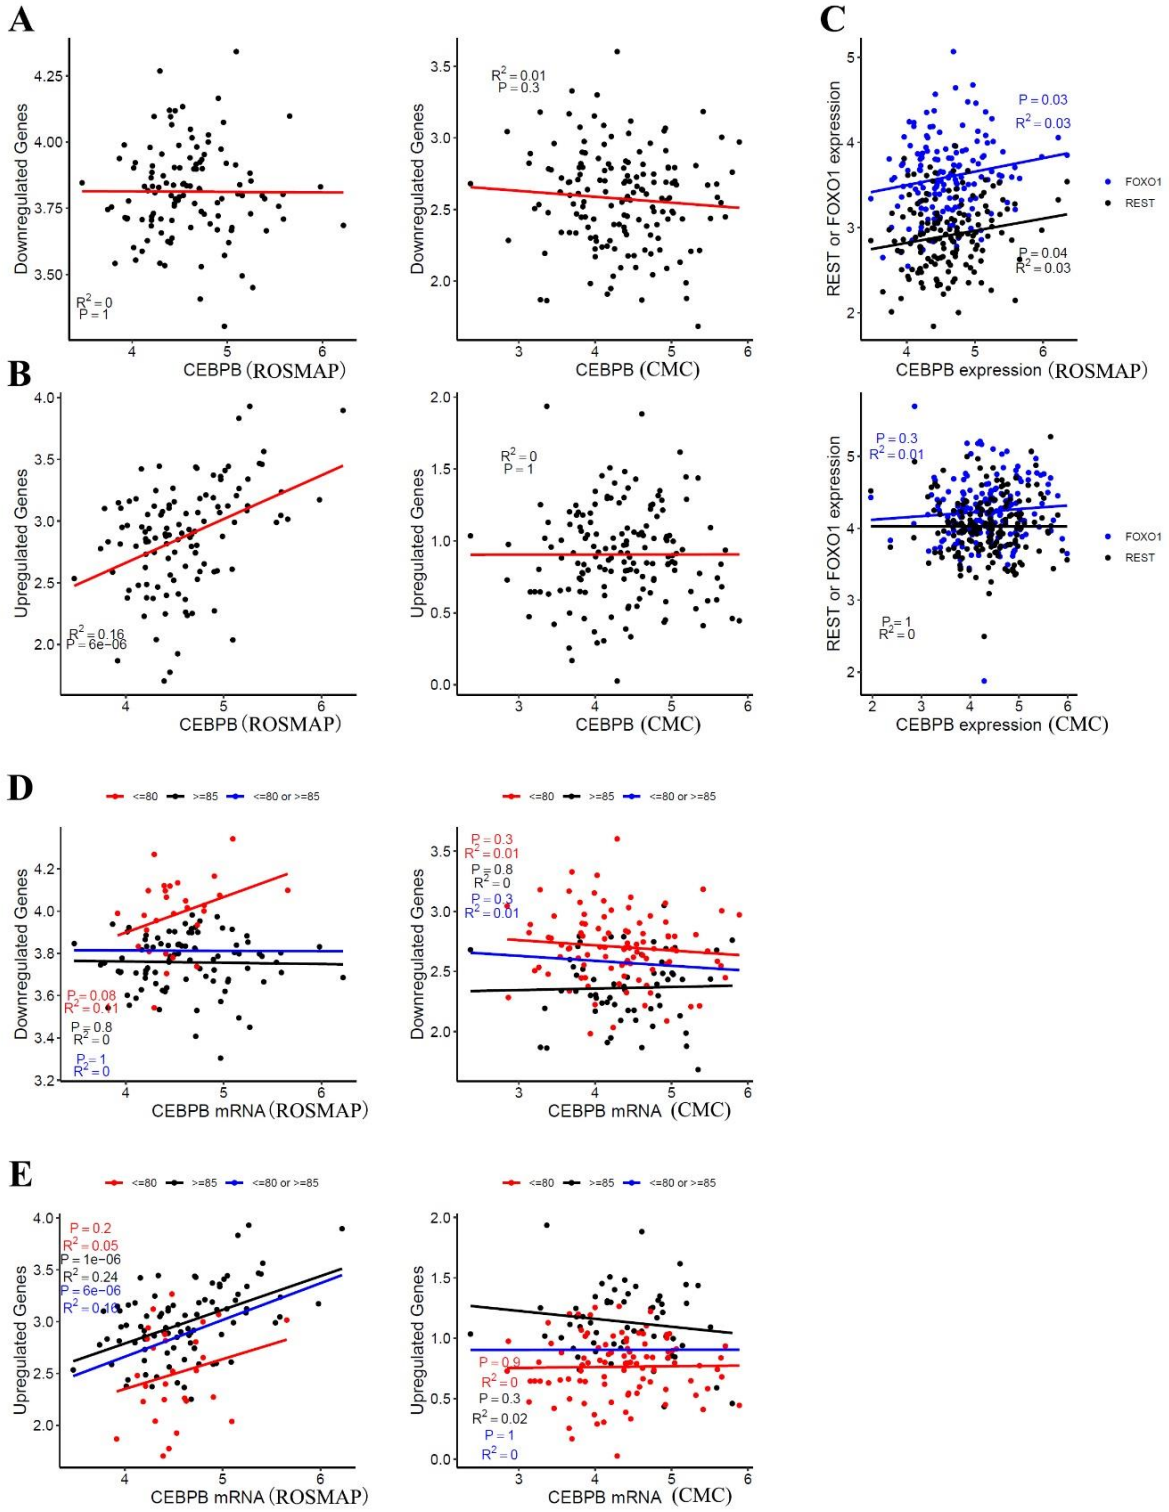

**Fig S6. Partitioning of the ageing human population for analysis of gene expression in the brain related to C/EBP $\beta$**

**A.** Expression of genes downregulated in individuals with extended longevity ( $\geq 85$  versus  $\leq 80$  years old) in the ROSMAP (n = 117 individuals) and CMC (n = 155 individuals) cohorts. There is no correlation to levels of *CEBPB* mRNA. Linear regression analysis of the mean expression of all downregulated genes, p values derived by t-tests of the regression line slopes. **B.**

Expression of genes upregulated in individuals with extended longevity ( $\geq 85$  versus  $\leq 80$  years old) in the ROSMAP (n = 117 individuals) and CMC (n = 155 individuals) cohorts. *CEBPB* mRNA is significantly associated with upregulated genes in ROSMAP, but insignificant in CMC. Linear regression analysis of the mean expression of all downregulated genes, p values derived by t-tests of the regression line slopes. **C.** Borderline significant associations with *REST* and *FOXO1* in ROSMAP, but not significant in CMC. **D.** Expression of genes downregulated in individuals with different ages ( $\geq 85$  or  $\leq 80$  years old) in the ROSMAP (n = 117 individuals), and CMC (n = 155 individuals) cohorts. **E.** Expression of genes upregulated in individuals with different ages ( $\geq 85$  or  $\leq 80$  years old) in the ROSMAP (n = 117 individuals) and CMC (n = 155 individuals) cohorts. *CEBPB* mRNA is significantly associated with upregulated genes in ROSMAP with extended longevity.

**Figure S7**

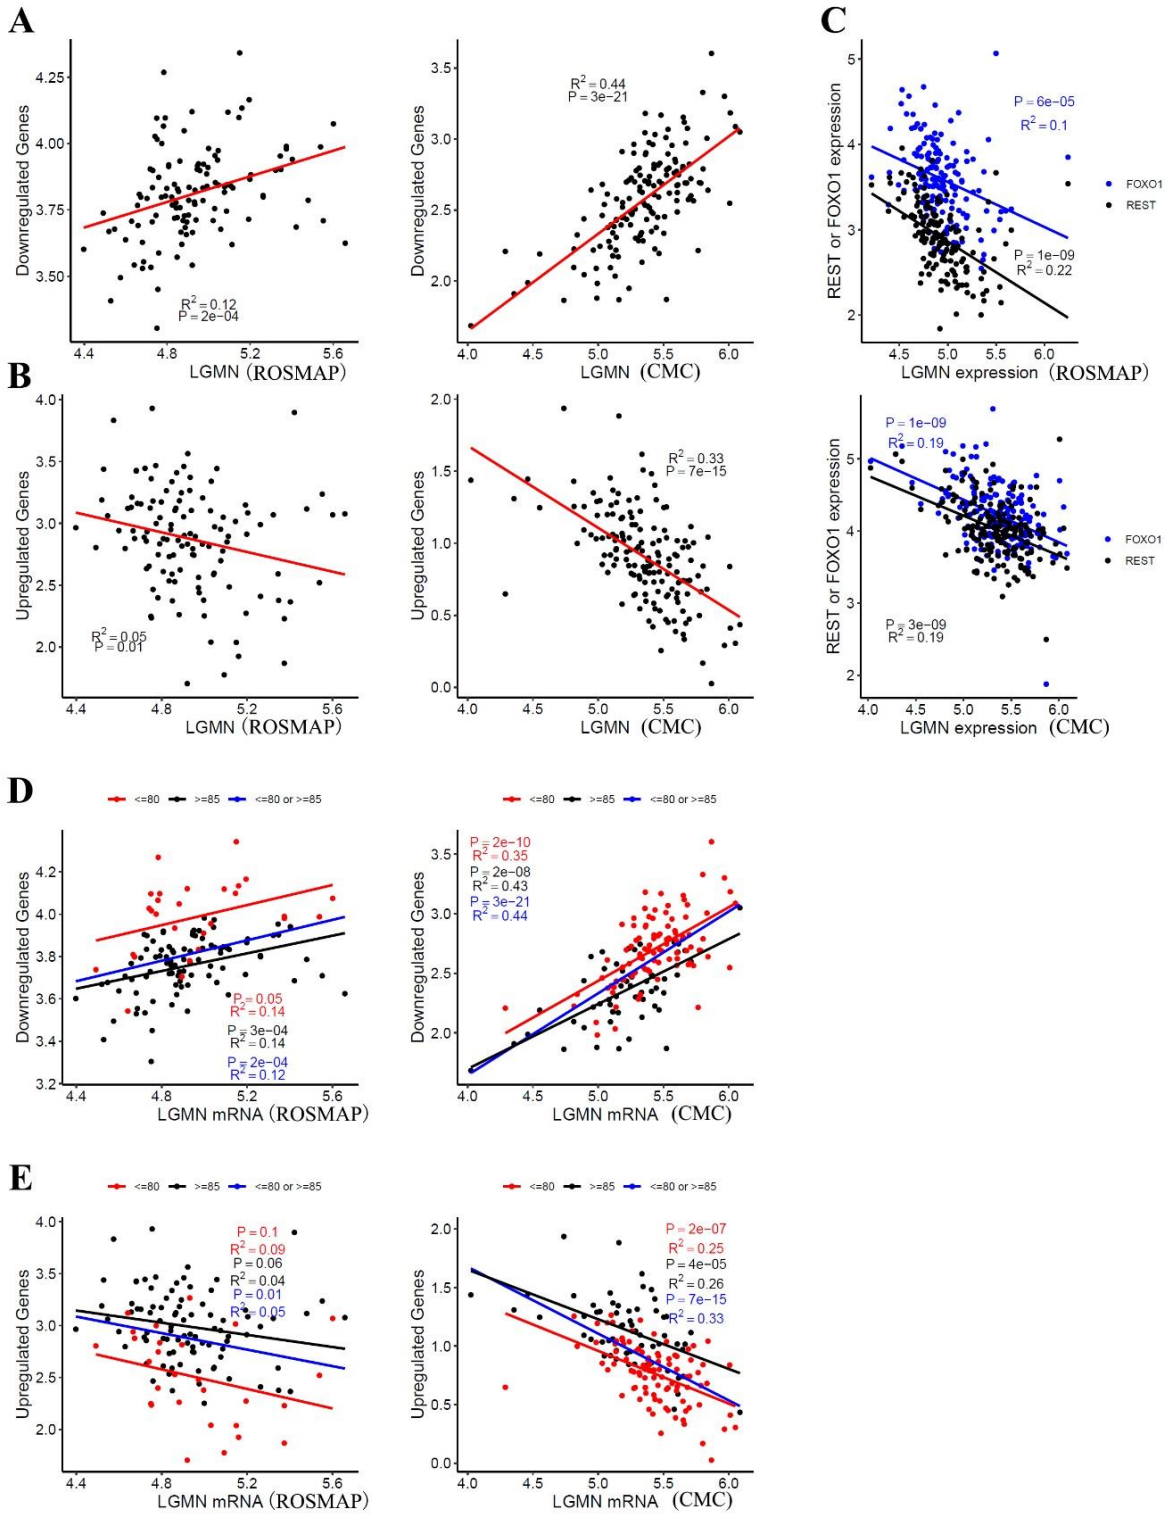



**Fig S7. Partitioning of the ageing human population for analysis of gene expression in the brain related to AEP**

**A.** Expression of genes downregulated in individuals with extended longevity ( $\geq 85$  versus  $\leq 80$  years old) in the ROSMAP (n = 117 individuals) and CMC (n = 155 individuals) cohorts. There is significant association with downregulated in ROSMAP and CMC related to levels of *LG MN* mRNA. Linear regression analysis of the mean expression of all downregulated genes, p values derived by t-tests of the regression line slopes. **B.** Expression of genes upregulated in individuals with extended longevity ( $\geq 85$  versus  $\leq 80$  years old) in the ROSMAP (n = 117 individuals) and CMC (n = 155 individuals) cohorts. *LG MN* mRNA is significant association with upregulated in CMC, but only borderline significant in ROSMAP. Linear regression analysis of the mean expression of all downregulated genes, p values derived by t-tests of the regression line slopes. **C.** Significant associations with *REST* and *FOXO1* in ROSMAP and CMC. **D.** Expression of genes downregulated in individuals with different ages ( $\geq 85$  or  $\leq 80$  years old) in the ROSMAP (n = 117 individuals) and CMC (n = 155 individuals) cohorts. *LG MN* mRNA is in significant association with downregulated genes in ROSMAP and CMC. **E.** Expression of genes upregulated in individuals with different ages ( $\geq 85$  or  $\leq 80$  years old) in the ROSMAP (n = 117 individuals) and CMC (n = 155 individuals) cohorts. *LG MN* mRNA is in significant association with upregulated in ROSMAP and CMC. There is evidence for a consistent association between *LG MN* expression and *DEGs*, *REST*, and *FOXO1*.

**Figure S8**

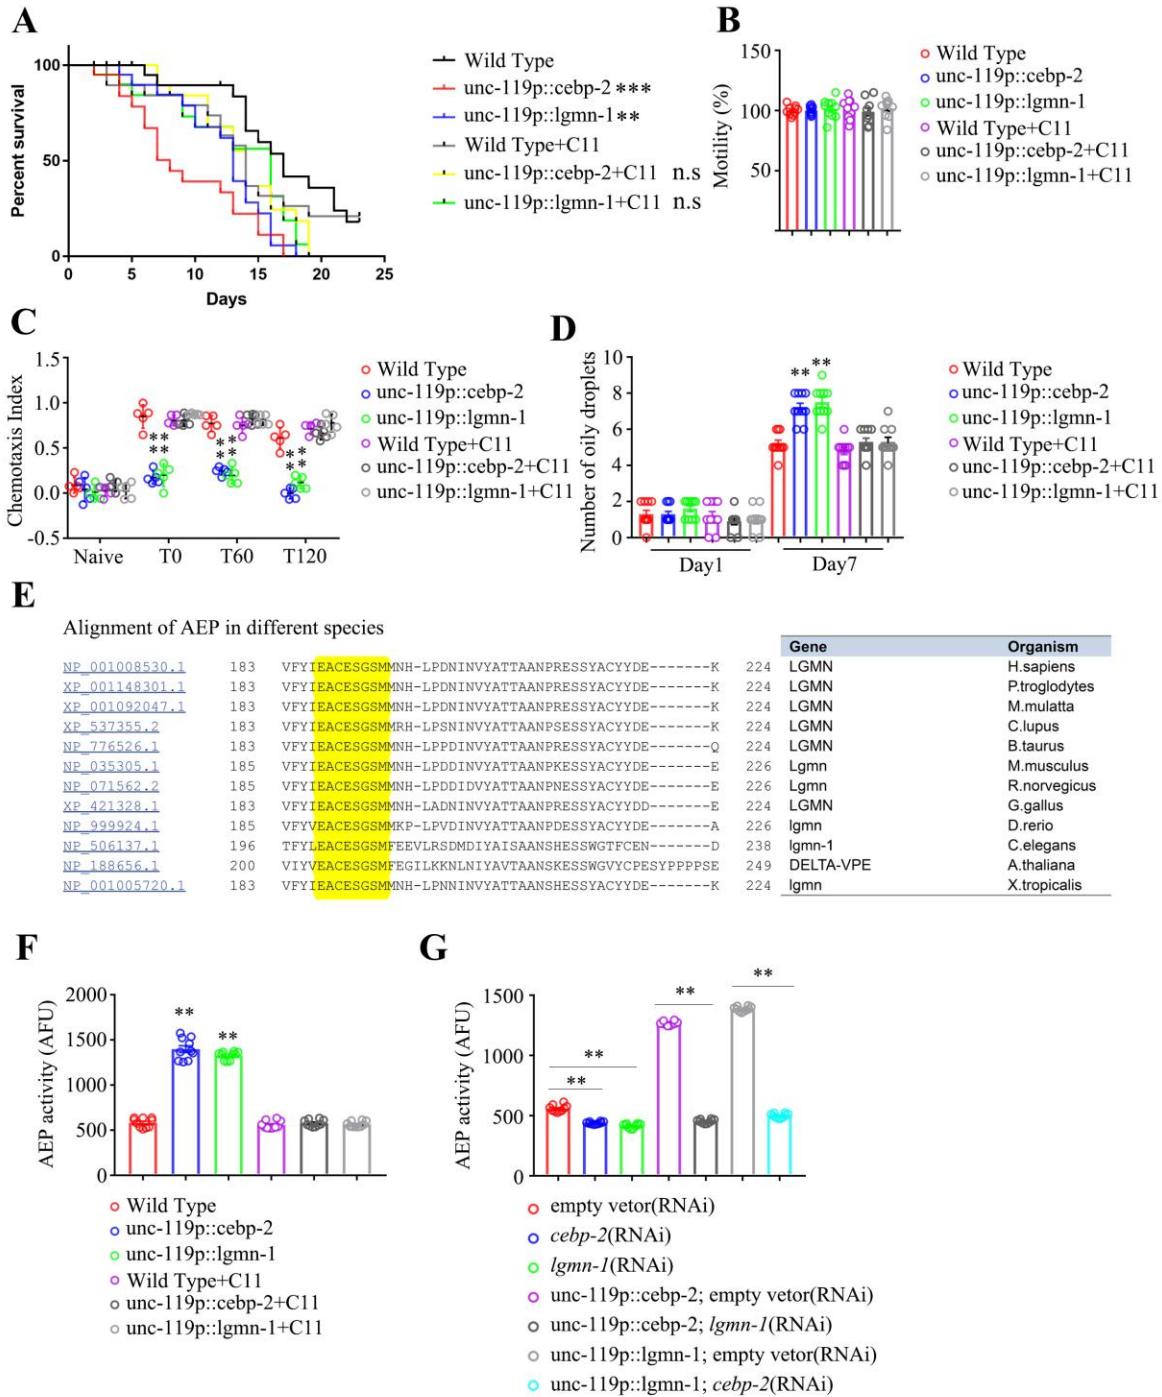

**Fig S8. AEP (LGMN-1) inhibitor C11 reverses the short lifespan induced by neuronal overexpression of *lgmn-1* or *cebp-2*.**

**A.** AEP inhibitor compound #11 (C11) reverses the short lifespan induced by neuronal overexpression *lgmn-1* or *cebp-2*.  $n = 30$  worms per group.  $p < 0.0001$ , log-rank test, \*\*  $p < 0.01$ , \*\*\*  $p < 0.001$  vs. N2. **B.** C11 does not affect whole animal locomotion. Day 2 worms were transferred to M9 liquid and thrashing rate was assessed. Shown are mean motility scores for the first 30 s.  $n = 10$  worms per group. Mann–Whitney U-test with multiple testing correction by Holm’s method. **C.** C11 restores cognitive function. C11 treatment reversed the defective positive butanone association scores induced by neuronal overexpression of *lgmn-1* or *cebp-2*. For each time point (T0 = 0, T60 = 60, and T120 = 120 min after conditioning), the CI values of [unc-119p::*cebp-2* + C11] and [unc-119p::*lgmn-1* + C11] are similar to those of wild type. unc-119p::*cebp-2* and unc-119p::*lgmn-1* show impaired learning and memory compared with wild type. Data were analyzed by two-way ANOVA and Sidak’s multiple comparison test, represented of five independent experiments. ( $n = 14$ -20 worms per experiment). Color circles represent individual CIs. **D.** C11 decreases age-associated oily droplet accumulation between the pharyngeal bulbs induced by neuronal overexpression of *lgmn-1* or *cebp-2*. Data are represented as mean  $\pm$  s.e.m. (days 7; two-way ANOVA and Sidak’s multiple comparison test; \*\*  $p < 0.01$  vs. N2). **E.** Alignment of AEP protein sequences in different species shows that the protease enzymatic domain is highly conserved. **F.** Quantification of C11’s inhibitory effect in AEP protease activities. Day 2 worm’s protein lysates were collected for AEP activity assay. Data are represented as mean  $\pm$  s.e.m., two-way ANOVA and Sidak’s multiple comparison test; \*\*  $p < 0.01$  vs. N2. **G.** Quantification of RNAi’s inhibitory effect in AEP protease activities. Day 2 worm’s protein lysates were collected for AEP activity assay. Data are represented as mean  $\pm$  s.e.m., two-way ANOVA and Sidak’s multiple comparison test; \*\*  $p < 0.01$ .

**Figure S9**

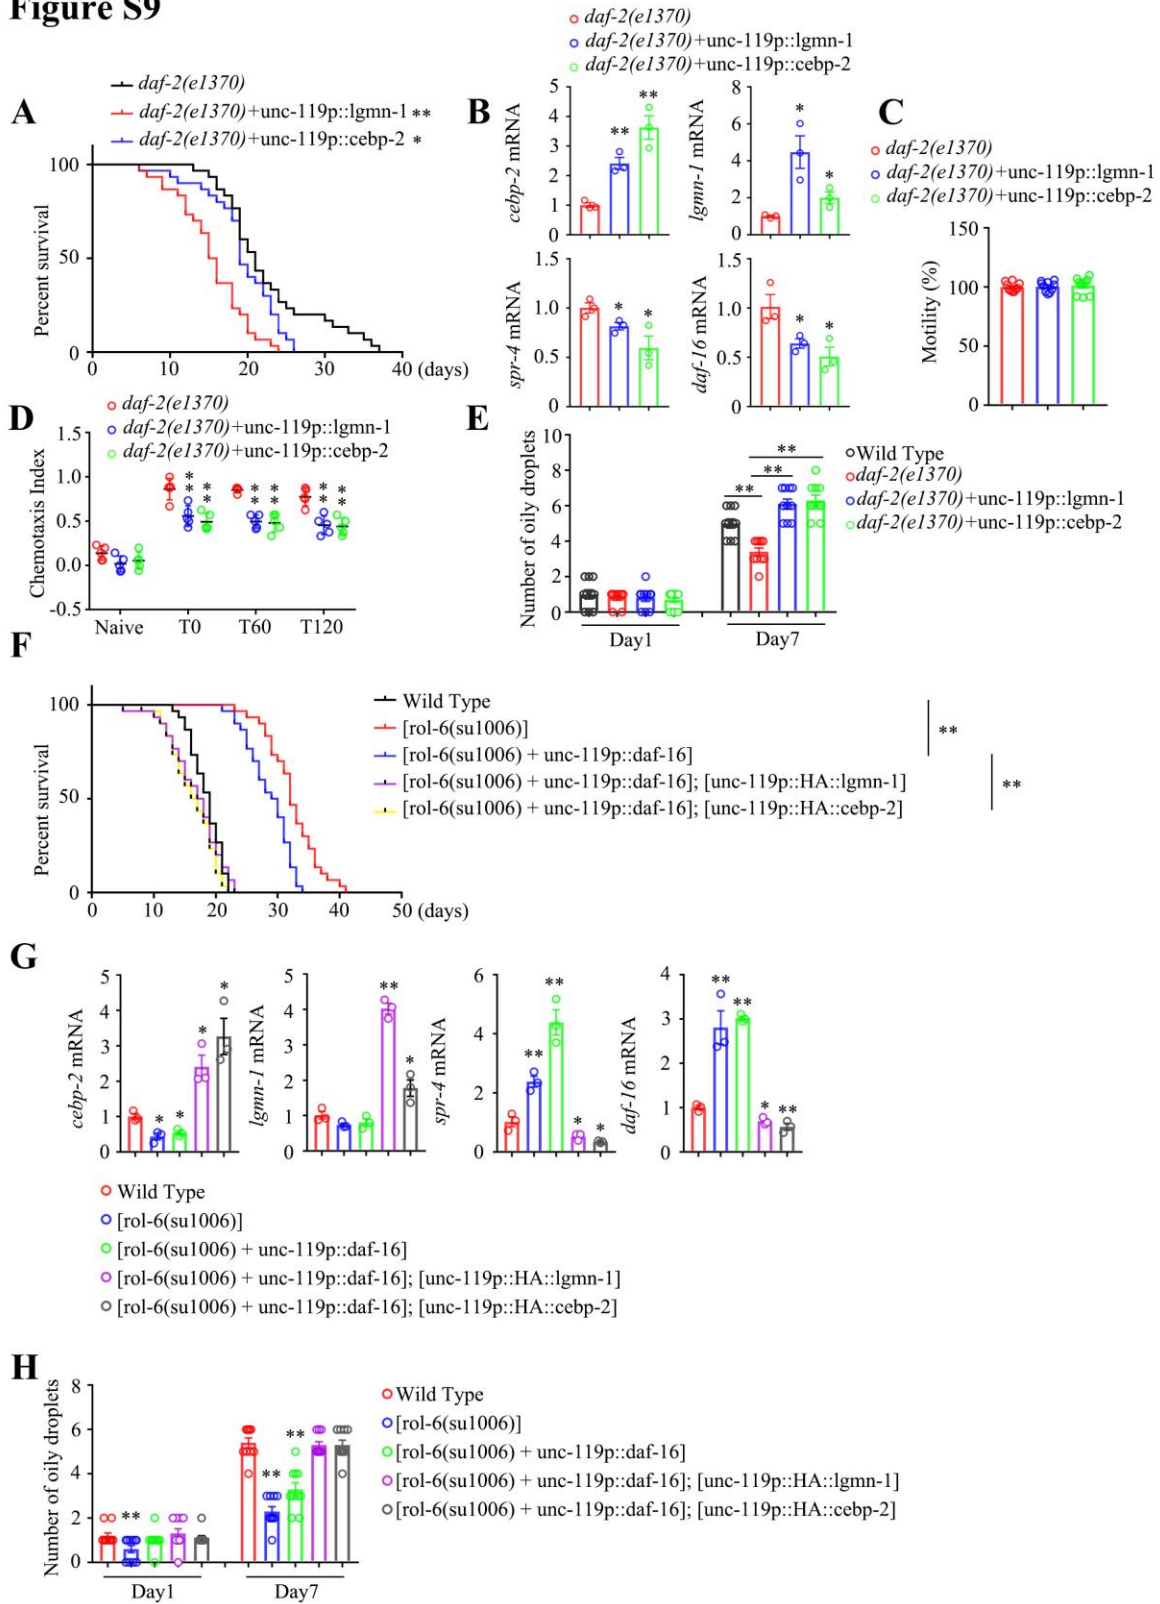

**Fig S9. Neuronal *lgmn-1* or *cebp-2* overexpression shortens the lifespan extended by loss of function of *daf-2* or overexpression of *daf-16*.**

**A.** Neuronal *lgmn-1* or *cebp-2* overexpression shortens the lifespan extended by loss of function of *daf-2*.  $n = 30$  worms per group.  $p < 0.0001$ , log-rank test, \*  $p < 0.05$ , \*\*  $p < 0.01$  vs. *daf-2(e1370)*. **B.** *cebp-2*, *lgmn-1*, *spr-4* and *daf-16* mRNA levels in worms of *daf-2(e1370)* and Neuronal *lgmn-1* or *cebp-2* overexpression *daf-2(e1370)*. Transcript levels were determined by qRT-PCR and normalized to *daf-2(e1370)* controls. Mean  $\pm$  s.e.m.,  $n = 3$ . \* $P < 0.05$ ; \*\* $P < 0.01$  by one-sided Student's T test. **C.** Motility assay. Neuronal *lgmn-1* or *cebp-2* overexpression did not affect the locomotion of *daf-2(e1370)*. Day 2 worms were transferred to M9 liquid and thrashing rate was measured. Shown are mean motility scores for the first 30 s.  $n = 10$  worms per group. Mann-Whitney U-test with multiple testing correction by Holm's method. **D.** Chemotaxis assay. Neuronal *lgmn-1* or *cebp-2* overexpression reduced the improvement in the positive butanone association induced by loss of function of *daf-2*. For each time point (T0 = 0, T60 = 60, and T120 = 120 min after conditioning), [*daf-2(e1370)*; *unc-119p::lgmn-1*] and [*daf-2(e1370)*; *unc-119p::cebp-2*] showed impaired learning and memory compared with *daf-2(e1370)*. Data were analyzed by two-way ANOVA and Sidak's multiple comparison test, represented of five independent experiments. ( $n = 14$ -20 worms per experiment). Color circles represent individual CIs. **E.** Oily droplet assay. Neuronal *lgmn-1* or *cebp-2* overexpression increased age-associated oily droplet accumulation induced in *daf-2(e1370)* worms. Wild Type= N2 line. Data are represented as mean  $\pm$  s.e.m. (days 7; two-way ANOVA and Sidak's multiple comparison test; \*\*  $p < 0.01$  vs. *daf-2(e1370)*). **F.** Neuronal *lgmn-1* or *cebp-2* overexpression shortened the lifespan extended by *daf-16* overexpression. To conduct these experiments we used the strain GB332 [*muIs131* [*unc-119p::GFP::daf-16* + *rol-6(su1006)*] which overexpresses GFP tagged DAF-16 in all neurons, and also carries the transgene marker *rol-6(su1006)*. Our true "wild type" control is actually WB141 which contains *rol-6(su1006)*. Note that WB141 (red line) has a much longer lifespan than wild type (strain N2; black line). This extended lifespan is likely due to the restricted locomotion of *rol-6(su1006)* which "rolls in place" rather than moves around searching for food, and thus is subjected to "caloric restriction". The relevant comparisons are between the overexpression of DAF-16 (plus *rol-6*) as a blue line, and [overexpression of DAF-16 (plus *rol-6*); *unc-119p::lgmn-1*] as a purple line, or [overexpression of DAF-16 (plus *rol-6*); *unc-119p::cebp-2*] as a yellow line.  $n = 30$  worms per group.  $p < 0.0001$ , log-rank test, \*\*  $p < 0.01$ . **G.** *cebp-2*, *lgmn-1*, *spr-4* and *daf-16* mRNA levels in worms list in F. Transcript levels were determined by qRT-PCR and normalized to Wild Type controls. Mean  $\pm$  s.e.m.,  $n = 3$ . \* $P < 0.05$ ; \*\* $P < 0.01$  by one-sided Student's T test. **H.** Oily droplet assay. Neuronal *lgmn-1* or *cebp-2* overexpression increased age-associated oily droplet accumulation induced by *daf-16* overexpression. The relevant comparisons are between the green and purple or black bars. Data are represented as mean  $\pm$  s.e.m. (days 7; two-way ANOVA and Sidak's multiple comparison test; \*\*  $p < 0.01$  vs. N2).



**Figure S10**

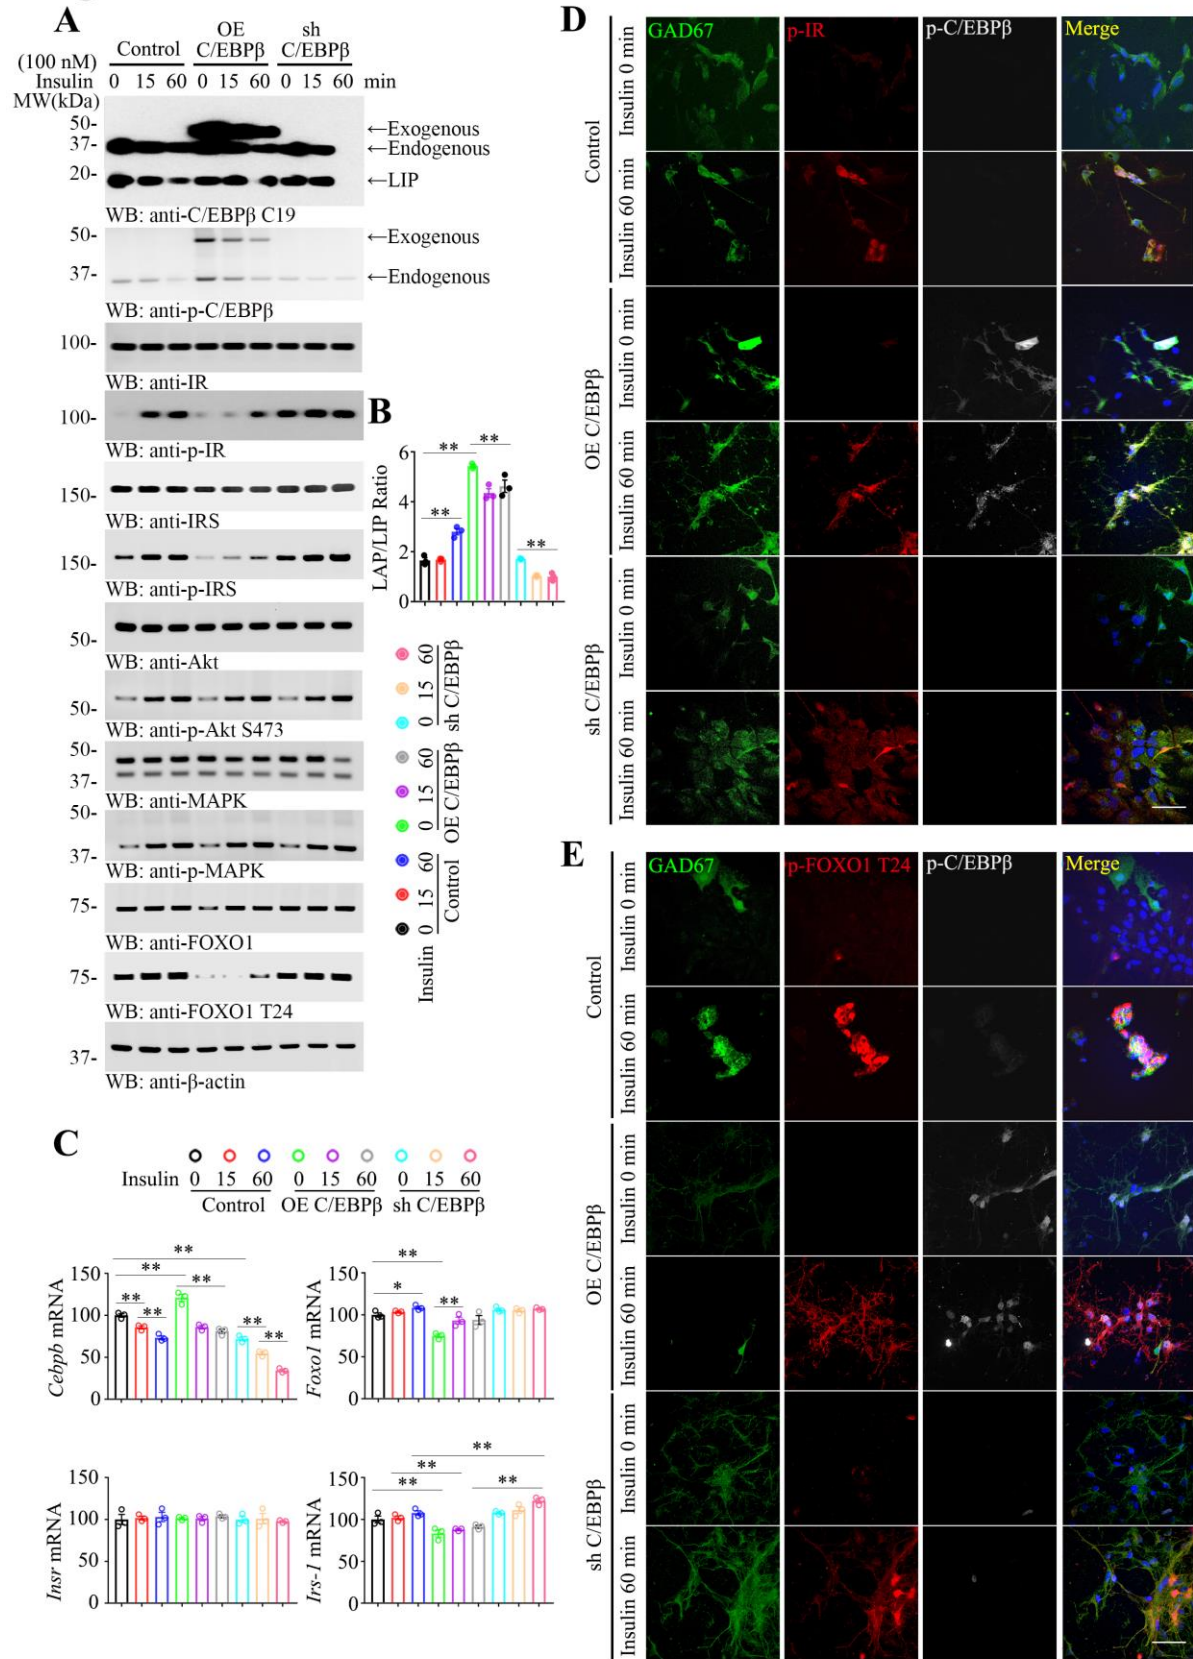

**Fig S10. C/EBP $\beta$  mediates insulin signaling in neurons, modulating p-FOXO1 T24 in GABAergic neurons.**

**A-C.** C/EBP $\beta$  overexpression diminishes insulin-induced p-IRS and p-FOXO1 T24. Rat primary neurons (DIV. 12) were infected with vector, overexpression or sh-C/EBP $\beta$  lentivirus for 72 h. without/with 100 nM insulin treatment for 0, 15, 60 min, respectively. Control=Vector virus. Neurons were harvested for WB with various indicated antibodies (A) or real-time PCR (C). Overexpression of C/EBP $\beta$  represses *Foxo1*, *Irs-1* mRNA expression. Data are represented as mean  $\pm$  s.e.m., n=3 per group. \*p<0.05, \*\*p <0.01, two-way ANOVA and Bonferroni's post hoc test. The LAP/LIP isoform ratios were calculated from quantification by immunoblots of A (B), Data are represented as mean  $\pm$  s.e.m., n=3 per group. \*\*p<0.01; two-way ANOVA and Bonferroni's post hoc test. **D.** C/EBP $\beta$  overexpression does not affect insulin-induced IR phosphorylation in GABAergic neurons. Neurons were analyzed under a confocal microscope. GAD67 marked the GABAergic neurons. The nuclei were stained with DAPI. Control=Vector virus (Scale bar: 50  $\mu$ m). **E.** C/EBP $\beta$  overexpression inhibits insulin-induced p-FOXO1 T24 in GABAergic neurons. Rat primary neurons (DIV. 12) were infected with vector, overexpression or sh-C/EBP $\beta$  lentivirus for 72 h. without/with 100 nM insulin treatment for 0, 15, 60 min, respectively. Neurons were fixed and permeabilized, cells were incubated with p-FOXO1 T24, p-C/EBP $\beta$  and GAD67 antibodies. After incubated with 3 secondary antibodies conjugated with Alexa Fluor<sup>TM</sup>-488, -594 or -Cy5 for 1 h, respectively, neurons were analyzed under a confocal microscope. GAD67 marked GABAergic neurons. The nuclei were stained with DAPI. Control=Vector virus (Scale bar: 50  $\mu$ m).

**Figure S11**

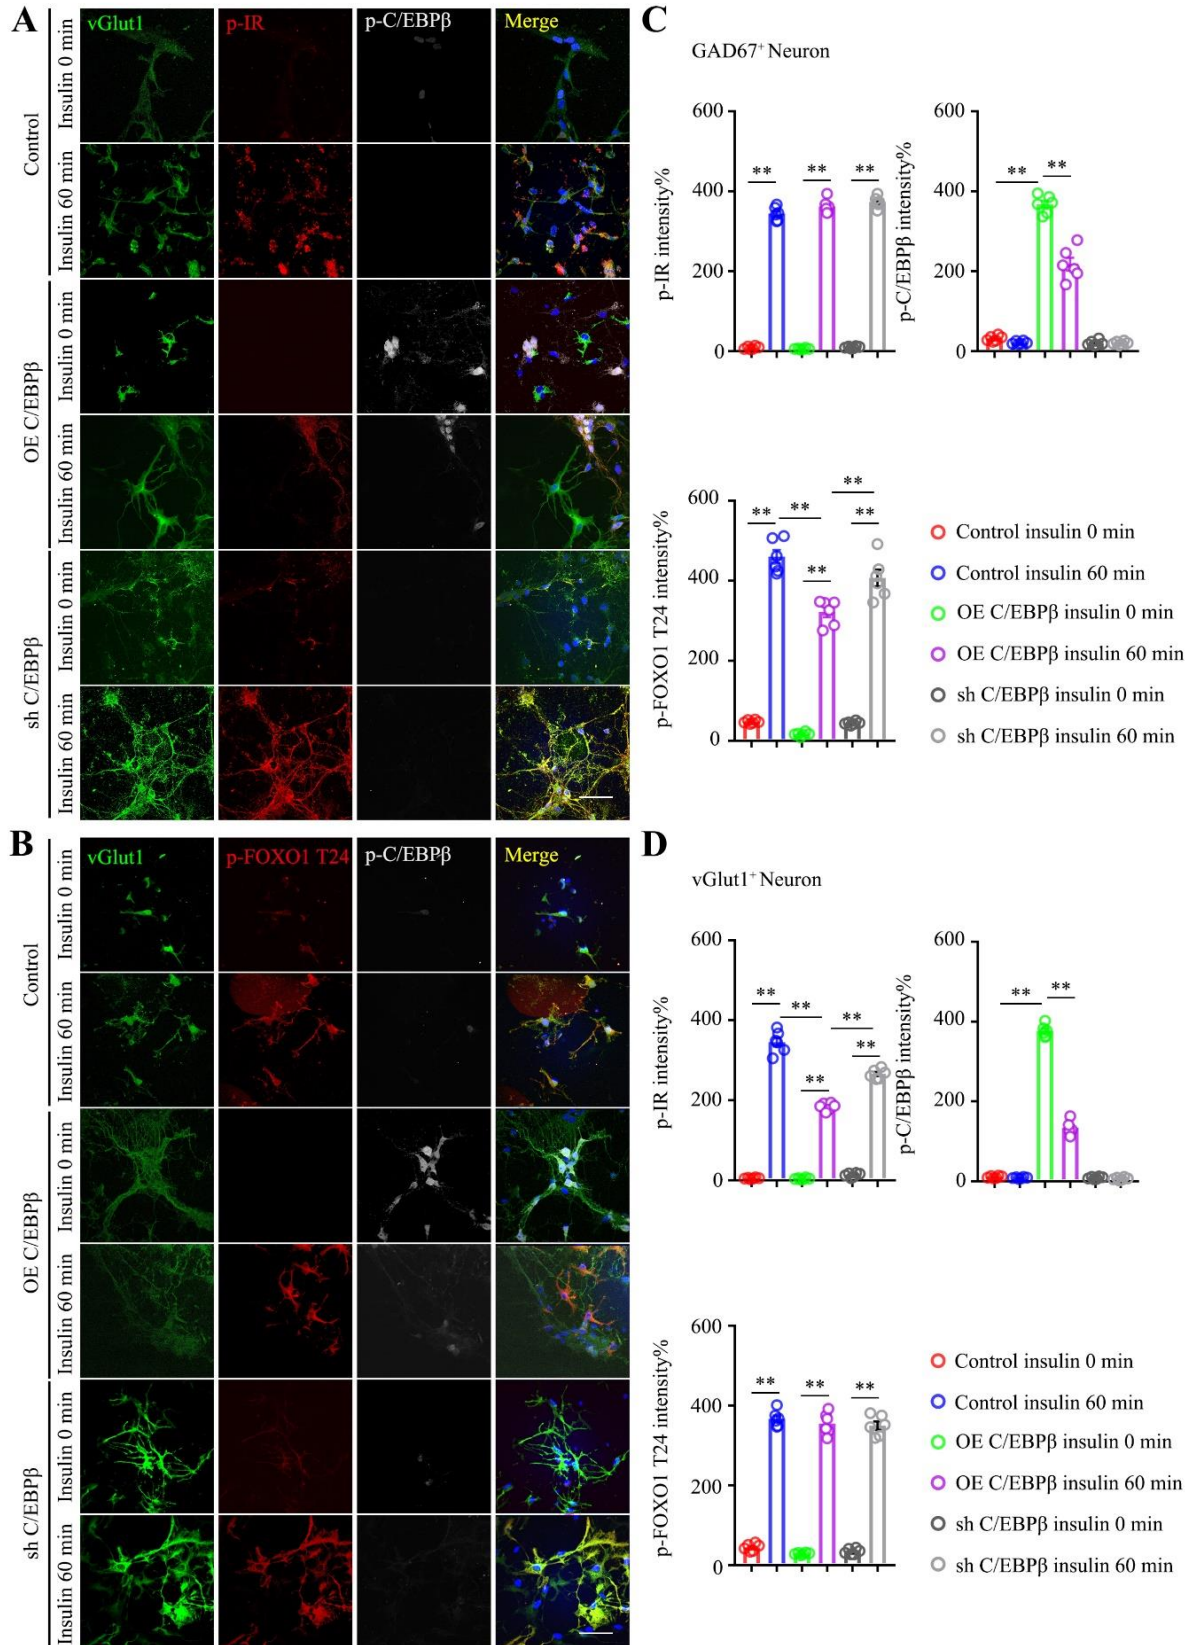

**Fig S11. Quantification of C/EBP $\beta$  overexpression's effect on insulin-induced p-FOXO1 T24 in neuron.**

**A**, C/EBP $\beta$  overexpression inhibits insulin-induced p-IR in Glutamatergic neurons. Neurons were analyzed under a confocal microscope. vGluT1 marked the Glutamatergic neurons. The nuclei were stained with DAPI. Control=Vector virus (Scale bar: 50  $\mu$ m). **B**, C/EBP $\beta$  overexpression does not affect insulin-induced FOXO1 T24 phosphorylation in GABAergic neurons. Neurons were analyzed under a confocal microscope. vGluT1 marked the Glutamatergic neuron. The nuclei were stained with DAPI. Control=Vector virus (Scale bar: 50  $\mu$ m). **C**. Quantification of GAD67<sup>+</sup> neuron p-C/EBP $\beta$ , p-IR and p-FOXO1-T24 intensity with treatment in Fig. S10 D-E. (mean  $\pm$  s.e.m.; n = 6; \*\*, p < 0.01; two-way ANOVA and Sidak's multiple comparison test). **D**. Quantification of vGluT1<sup>+</sup> neuron p-C/EBP $\beta$ , p-IR and p-FOXO1-T24 intensity with treatment in Fig. S11 A-B. (mean  $\pm$  s.e.m.; n = 6; \*\*, p < 0.01; two-way ANOVA and Sidak's multiple comparison test).



**Figure S12**

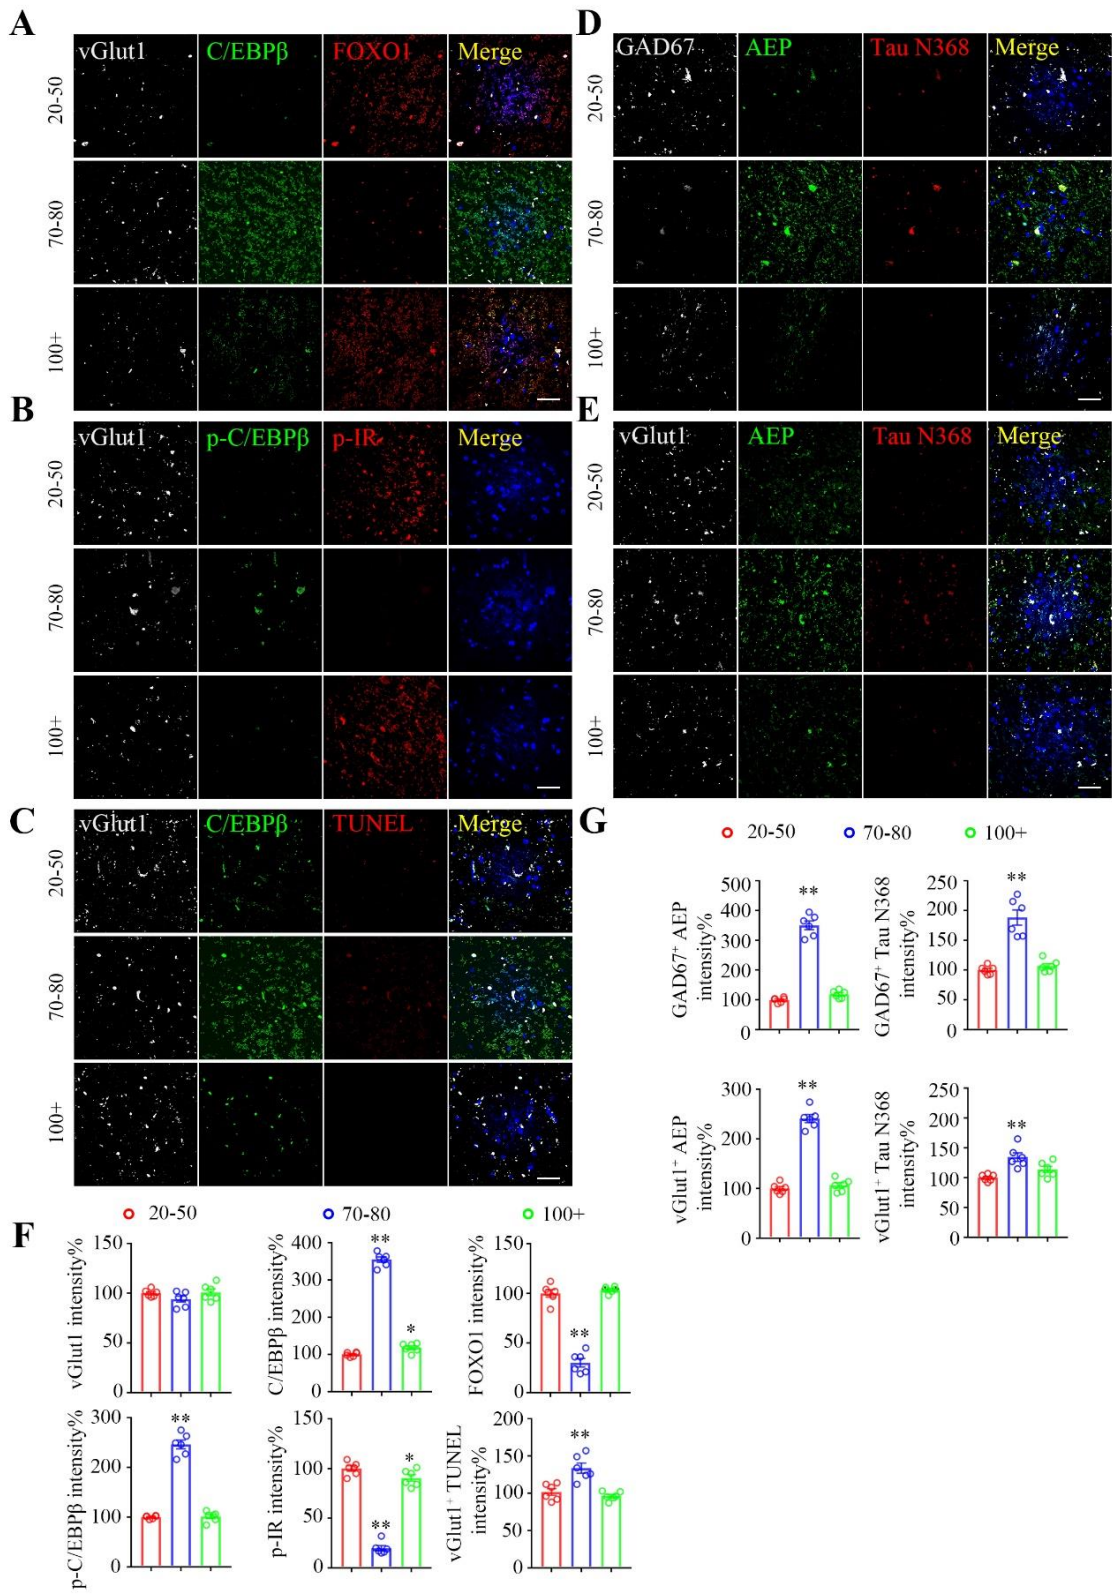



**Fig S12. C/EBP $\beta$  mediates insulin signaling in neurons, and promotes tau N368 cleavage by AEP**

**A-C.** Immunofluorescent co-staining on human brain sections. Colocalization of C/EBP $\beta$ , FOXO1, p-C/EBP $\beta$ , p-IR, and TUNEL in vGlut1<sup>+</sup> neurons from the different ages' human cerebral cortexes. Confocal immunofluorescence microscopy was performed in human cerebral cortex. Scale bar, 40  $\mu$ m. The image shown is representative of immunofluorescence labeling performed in 3 individuals. **D&E.** Colocalization of AEP and Tau N368 in vGlut1<sup>+</sup> or GAD67<sup>+</sup> neurons from the different ages' human cerebral cortexes. Confocal immunofluorescence microscopy was performed in human cerebral cortex. Scale bar, 40  $\mu$ m. The image shown is representative of immunofluorescence labelling performed in 3 individuals. **F.** Quantification of A-C, Data are represented as mean  $\pm$  s.e.m., n=6 per group. \*\*p <0.01 vs. 20-50 group; Mann-Whitney U-test with multiple testing correction by Holm's method. **G.** Quantification of D&E, Data are represented as mean  $\pm$  s.e.m., n=6 per group. \*p<0.05, \*\*p <0.01 vs. 20-50 group; Mann-Whitney U-test with multiple testing correction by Holm's method.

**Figure S13**

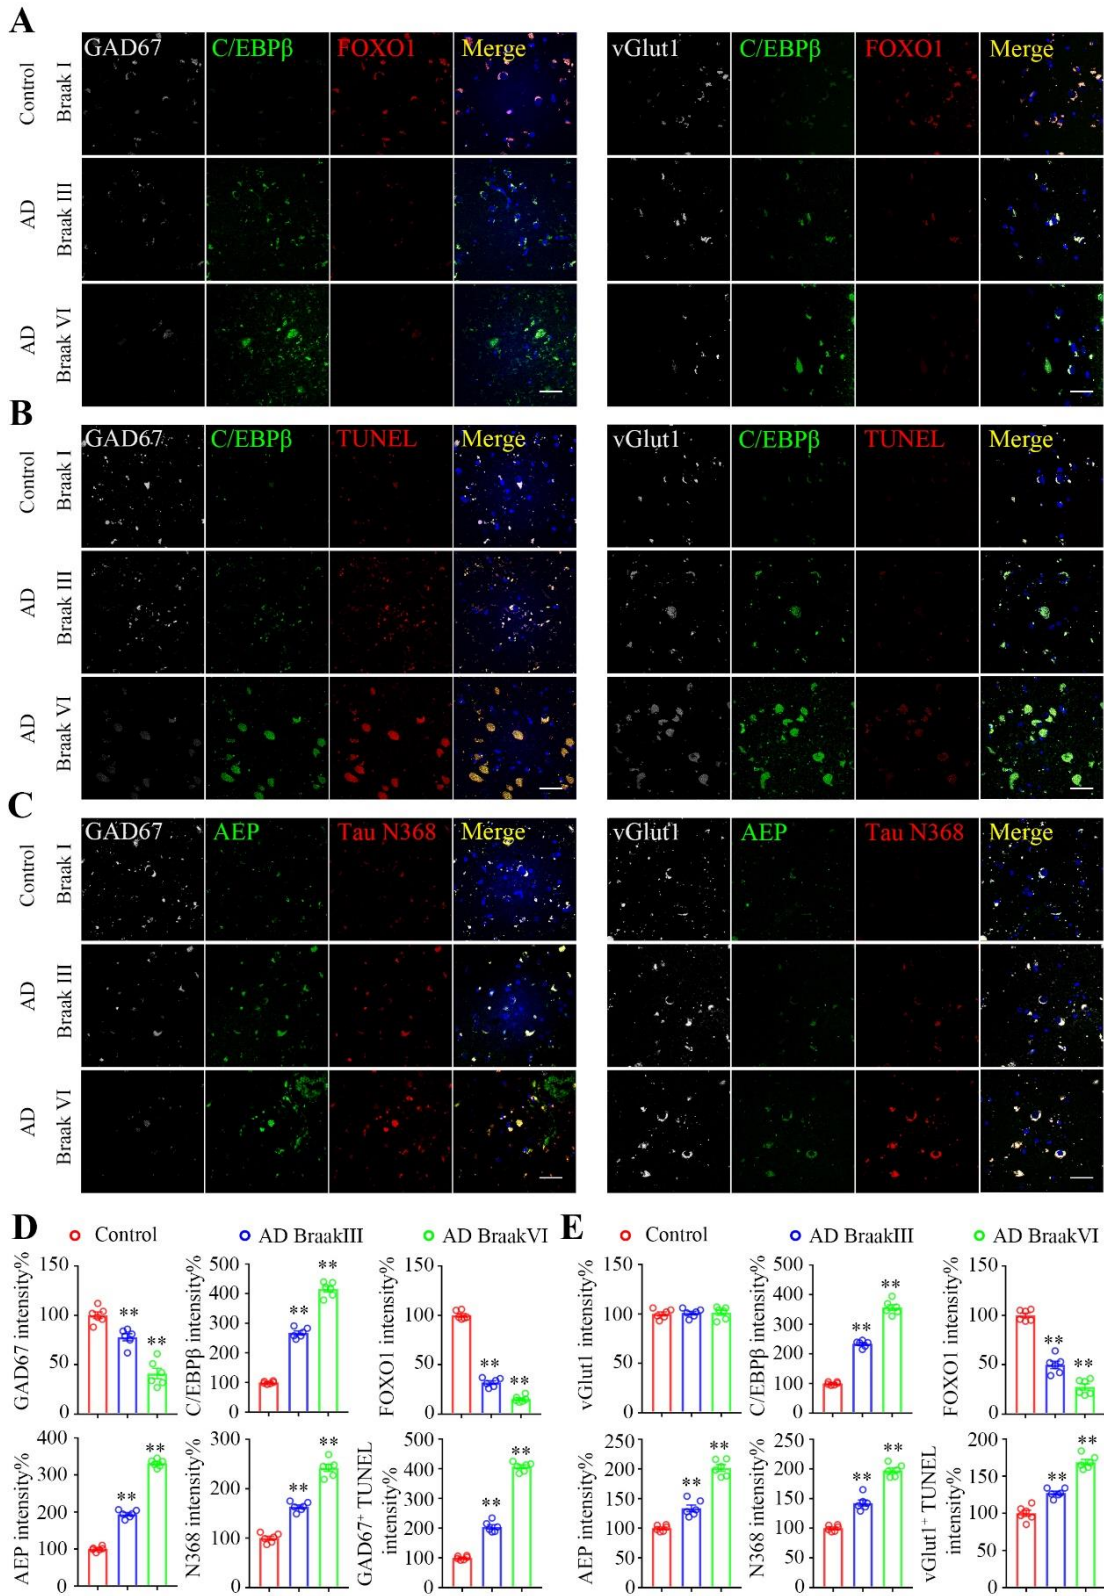

**Fig S13. C/EBP $\beta$ , FOXO1, and AEP in AD pathologies.**

**A-C.** Immunofluorescent analysis of C/EBP $\beta$ , FOXO1, AEP, Tau N368, and TUNEL in GAD67<sup>+</sup> or vGlut1<sup>+</sup> neurons of the different Braak stages in human AD patients' cerebral cortexes. Confocal immunofluorescence microscopy was performed in human cerebral cortex. Control=Normal ageing. Scale bar, 40  $\mu$ m. The image shown is representative of immunofluorescence labelling performed in 3 individuals.

**D&E.** Quantification of A-C, Data are represented as mean  $\pm$  s.e.m., n=6 per group. \*\*p <0.01 vs. control group; Mann-Whitney U-test with multiple testing correction by Holm's method.

# Figure S14

**A**

## CEBPB NP\_005185.2

Sequence ID: Query\_195459 Length: 345 Number of Matches: 1

Range 1: 272 to 331 [Graphics](#)

[▼ Next Match](#) [▲ Previous Match](#)

| Score          | Expect                                                         | Method                       | Identities | Positives  | Gaps     |
|----------------|----------------------------------------------------------------|------------------------------|------------|------------|----------|
| 57.8 bits(138) | 9e-16                                                          | Compositional matrix adjust. | 29/60(48%) | 41/60(68%) | 0/60(0%) |
| Query 18       | DDYSTKRRKRNNEAVNRTRQKKRQEENDTAEKVDELKKNENETLERKVEQLQKELSFLKEMF | 77                           |            |            |          |
|                | D+Y +R+RNN AV ++R K + +T KV EL ENE L++KVEQL +ELS L+ +F         |                              |            |            |          |
| Sbjct 272      | DEYKIRRENNIAVRKSRDKAKMRNLETQHKVLELTAENERLQKKVEQLSRELSLRLNLF    | 331                          |            |            |          |

**B**

## CEBPG NP\_001797.1

Sequence ID: Query\_34229 Length: 150 Number of Matches: 1

Range 1: 55 to 128 [Graphics](#)

[▼ Next Match](#) [▲ Previous Match](#)

| Score          | Expect                                                        | Method                       | Identities | Positives  | Gaps     |
|----------------|---------------------------------------------------------------|------------------------------|------------|------------|----------|
| 70.9 bits(172) | 6e-22                                                         | Compositional matrix adjust. | 34/74(46%) | 54/74(72%) | 0/74(0%) |
| Query 10       | SEPREDEDDYSTKRRKRNNEAVNRTRQKKRQEENDTAEKVDELKKNENETLERKVEQLQKE | 69                           |            |            |          |
|                | S P + + D+Y +R+RNN AV ++R K +Q+ DI ++V++LK+ENE LE K++ L KE    |                              |            |            |          |
| Sbjct 55       | SSPMDRNSDEYRQRRENNMAVKKSRLLKSKQKAQDTLQRVNQLKEENERLEAKIKLLTKE  | 114                          |            |            |          |
| Query 70       | LSFLKEMFMAYAKN 83                                             |                              |            |            |          |
|                | LS LK++F+ +A N                                                |                              |            |            |          |
| Sbjct 115      | LSVLKDLFLEHAHN 128                                            |                              |            |            |          |

**C**

### Alignments

```

-----
1. CEBPG
2. CEBP-2
3. CEBPB  MQLVAVDPAACLPLPPPPPAFKSMEVANFYEEADCLAAAYGGKAAPAAPPAARPGPRPPAGELGSGDHERAIDFSPYLEPLGAPQAPAPATATDTFEAA 100

```

```

-----
1. CEBPG
2. CEBP-2
3. CEBPB  PPAPAPAPASSGGHHDFLSDLFSDDYGGKCKKPAEYGYVSLGRLGAAGALHPGCFAPLHPPPPPPPPAELKAEPGFEPADCKRKEEAGAPGGGAGMA 200

```

```

-----
1. CEBPG  -----XXXXXXXXXXQXXXGXXGXXXXXXXXXXXXG--XXXXXXXXXXPXXXXXGXXXXXXXXXXKSKS P DXXSDEYXXRRERNNAV KSRK KQXXXDTX 91
2. CEBP-2  -----MSKISQXNSTPGVNGISVIHTQAHASG--LQQVQLVPAGPGGGGKAVAPSKQSKKSSPMDRNSDEYRQRRENNHAKKSRLLKSKQKAQDTL 46
3. CEBPB   AGFPYALRAYLGYQAVPSGSSGSLSTSSSSSPPTPSPADAKAPPATACYAGAAPAPSQVKSAAKKTVDKHSDEYKIRRENNIAVRKSRDKAKMRNLETQ 300

```

**Fig S14. Alignments of *C. elegans* CEBP-2 and human C/EBP $\beta$  and C/EBP $\gamma$  proteins.**

**A.** Blasting CEBP-2 (NP\_871835.1) with C/EBP $\beta$  (NP\_005185.2) showed 48% amino acid (a. a.) identity with the human C/EBP $\beta$ . **B.** Blasting CEBP-2 (NP\_871835.1) with C/EBP $\gamma$  (NP\_001797.1) showed 46% amino acid (a. a.) identity with the human C/EBP $\gamma$ . **C.** Protein sequence alignments of *C. elegans* CEBP-2 and human C/EBP $\beta$  and C/EBP $\gamma$  showed there is not much difference between C/EBP $\beta$  and C/EBP $\gamma$ .

**Table S1. Human Brain tissue information**

| Case | Primary Neuropathologic Diagnosis | Secondary Neuropathologic Diagnosis | PMI (hr) | Age at Onset | Age at Death/Bx | Duration (years) | ApoE | Race/Sex | Braak Score |
|------|-----------------------------------|-------------------------------------|----------|--------------|-----------------|------------------|------|----------|-------------|
| 1    | Control                           |                                     | 4.5      |              | 70              |                  | E3/3 | hm       | I           |
| 2    | Control                           |                                     | 6        |              | 75              |                  | E3/3 | wf       | I           |
| 3    | Control                           |                                     | 7        |              | 74              |                  | E3/3 | wf       | II          |
| 4    | AD                                | Microinfarcts                       | 78       |              | 77              |                  | E3/4 | wm       | III         |
| 5    | AD                                | NFT-Braak stage III                 | 6        |              | 91              |                  | E3/3 | wf       | III         |
| 6    | AD                                |                                     | 20       | 50           | 57              | 7                | E3/4 | bf       | III         |
| 7    | AD                                | LBD-amygdala                        | 5.5      | ~48          | 69              | ~21              | E4/4 | wf       | VI          |
| 8    | AD                                | Infarct                             | 9        | 57           | 77              | 21               | E4/4 | wm       | VI          |
| 9    | AD                                |                                     | 5        | 52           | 60              | 8                | E4/4 | bm       | VI          |
| 10   | Control                           |                                     | 4.5      |              | 20              |                  | E4/4 | bf       | 0           |
| 11   | Control                           |                                     | 31       |              | 40              |                  | E3/4 | wm       | 0           |
| 12   | Control                           |                                     | 6.5      |              | 46              |                  | E3/3 | wf       | 0           |
| 13   | Control                           |                                     | 6.5      |              | 53              |                  | E4/4 | bm       | II          |
| 14   | Control                           |                                     | 17       |              | 57              |                  | E3/3 | bf       | I           |
| 15   | Control                           |                                     | 8        |              | 60              |                  | E3/4 | bf       | I           |
| 16   | Control                           |                                     |          |              | 72              |                  |      | wf       | II          |
| 17   | Control                           |                                     |          |              | 74              |                  |      | wf       | II          |
| 18   | Control                           |                                     |          |              | 76              |                  |      | wf       | I           |
| 19   | Control                           |                                     | 6        |              | 91              |                  | E3/3 | wf       | III         |
| 20   | Control                           |                                     | 15.5     |              | 92              |                  | E3/3 | wf       | III         |
| 21   | Control                           |                                     | 5.5      |              | 94              |                  | E3/3 | wm       | II          |
| 22   | Control                           |                                     |          |              | 101             |                  |      | wf       | III         |
| 23   | Control                           |                                     |          |              | 103             |                  |      | wf       | IV          |
| 24   | Control                           |                                     |          |              | 103             |                  |      | wf       | IV          |

**Table S2. Key reagents list**

| REAGENT or RESOURCE                                                              | SOURCE           | IDENTIFIER |
|----------------------------------------------------------------------------------|------------------|------------|
| AEP (11b7) mouse monoclonal antibody                                             | Colin Watts Lab  | NA         |
| Akt antibody                                                                     | Cell signaling   | #9272      |
| Bim (C34C5) antibody                                                             | Cell signaling   | 2933S      |
| C/EBP $\beta$ (C19) antibody                                                     | Santa Cruz       | SC-150     |
| C/EBP $\beta$ (H-7) antibody                                                     | Santa Cruz       | sc-7962    |
| Cleaved caspase 3 antibody                                                       | Cell signaling   | #9661      |
| FoxO1 antibody                                                                   | Cell signaling   | #9462      |
| FoxO3a (D19A7) antibody                                                          | Cell signaling   | #12829     |
| GABA antibody                                                                    | Abcam            | ab17413    |
| GAD67 (F-6) antibody                                                             | Santa Cruz       | sc-28376   |
| GFP (B-2) antibody                                                               | Santa Cruz       | sc-9996    |
| Histone H3 (D2B12) antibody                                                      | Cell signaling   | #4620      |
| Insulin Receptor $\beta$ (4B8) antibody                                          | Cell signaling   | #3025      |
| IRS-1 (C-20) antibody                                                            | Santa Cruz       | SC-559     |
| Legumain (D6S4H) antibody                                                        | Cell signaling   | #93627     |
| MAPK 1/2 antibody                                                                | Sigma            | ABS44      |
| mCherry (E5D8F) antibody                                                         | Cell signaling   | #43590     |
| Mouse Legumain/Asparaginyl Endopeptidase antibody                                | R&D Systems      | AF2058     |
| MST1/Krs2 antibody                                                               | Sigma            | 07-061     |
| NeuN (E4M5P) antibody                                                            | Cell signaling   | #94403     |
| phospho-Akt (Ser473) antibody                                                    | Sigma            | 05-1003    |
| Phospho-C/EBP $\beta$ (Thr235) antibody                                          | Cell signaling   | #3084      |
| Phospho-FoxO1 (Thr24)/FoxO3a (Thr32) antibody                                    | Cell signaling   | #9464      |
| Phospho-FOXO1/FOXO3 (Ser207, Ser212) antibody                                    | Thermofisher     | 44-1230G   |
| Phospho-Insulin Receptor $\beta$ (Tyr1146) antibody                              | Cell signaling   | #3021      |
| Phospho-p44/42 MAPK (Erk1/2) (Thr202/Tyr204) antibody                            | Cell signaling   | #4370      |
| Phospho-Tau (Ser202, Thr205) Monoclonal Antibody (AT8)                           | Thermofisher     | MN1020     |
| p-IRS1 Tyr608 mouse/Tyr612 human antibody                                        | Sigma            | 09-432     |
| p-MST1 T183 antibody                                                             | Abcam            | ab79199    |
| REST antibody                                                                    | Thermofisher     | 22242-1-AP |
| Tau Monoclonal Antibody (TAU-5) antibody                                         | Thermofisher     | AHB0042    |
| Tau N368 antibody                                                                | Ye lab           | NA         |
| VGLUT 1 antibody                                                                 | Synaptic Systems | 135011     |
| $\beta$ -actin antibody                                                          | Sigma            | A1978      |
| Anti-rabbit IgG (H+L), F(ab') <sub>2</sub> Fragment (Alexa Fluor® 594 Conjugate) | Cell signaling   | 8889S      |
| Anti-rabbit IgG (H+L), F(ab') <sub>2</sub> Fragment (Alexa Fluor® 488 Conjugate) | Cell signaling   | 4412S      |
| DAPI (4',6-Diamidino-2-Phenylindole, Dihydrochloride)                            | Thermofisher     | D1306      |
| Pentylentetrazole(PTZ)                                                           | Caymanchemical   | 18682      |
| Human Insulin ELISA Kit                                                          | Sigma            | RAB0327    |



**Supporting file 1. The sequence of targeting vectors of C/EBP $\beta$  Tg mice.**

Mouse genomic fragments containing homology arms (HAs) were amplified from bacterial artificial chromosome (BAC) clone by using high fidelity Taq, and were sequentially assembled into a targeting vector together with recombination sites and selection markers.
